# Supplementary material for: Polar Codes for Covert Communications over Asynchronous Discrete Memoryless Channels
Source: MDPI journal article supplement (doi:10.3390/e20010003), 2017-12-22
Supplement: s1 [file s1]

# Supplementary material for Proposition 3.1

## 1 Notations and preliminaries

The functions  $\log$  and  $\ln$  denote respectively the base 2 and the natural logarithms. By convention,  $0 \log 0 = 0 = 0 \ln 0$ . For  $x \in \mathbb{R}$ ,  $\lfloor x \rfloor$  (resp.  $\lceil x \rceil$ ) denotes the greatest (resp. smallest) integer not greater (resp. not smaller) than  $x$ . For integers  $a \leq b$ ,  $\llbracket a, b \rrbracket$  denotes the set of integers between  $a$  and  $b$ , bounds included. Let  $\mathbb{D} = \{2^\mu : \mu \in \mathbb{N}\}$ .

Let  $(X, Y) \simeq P_{X,Y}$  be an arbitrary pair of random variables over  $\mathcal{B} \times \mathcal{Y}$  with  $\mathcal{B} = \{0, 1\}$  and  $\mathcal{Y}$  an arbitrary countable set. We regard  $(X, Y)$  as a memoryless source  $S$ , with  $X$  as the part to be compressed and  $Y$  in the role of “side-information” about  $X$ . We consider a sequence  $S = \{(X_i, Y_i) : i \in \mathbb{N}^*\}$  of independent drawings from  $(X, Y)$  – which can be interpreted as a representation of the source  $S$  – and we introduce the two transformations  $^-$  and  $^+$  applied to the source  $S$  and defined by

$$S^- = \{(X_{2i-1} \oplus X_{2i}, (Y_{2i-1}, Y_{2i})) : i \in \mathbb{N}^*\} \quad (1)$$

$$S^+ = \{(X_{2i}, (Y_{2i-1}, Y_{2i}, X_{2i-1} \oplus X_{2i})) : i \in \mathbb{N}^*\}. \quad (2)$$

With these notations,  $S^-$  (resp.  $S^+$ ) is the memoryless source that takes its values in  $\mathcal{B} \times (\mathcal{Y}^2)$  (resp. in  $\mathcal{B} \times (\mathcal{Y}^2 \times \mathcal{B})$ ), with  $X_1 \oplus X_2$  (resp.  $X_2$ ) as the part to be compressed and  $(Y_1, Y_2)$  (resp.  $(Y_1, Y_2, X_1 \oplus X_2)$ ) in the role of “side-information”.

The process that constructs  $S^-$  and  $S^+$  from  $S$  can be written  $S_0^{(0)} = S$ ,

$$S_1^{(0)} = \left(S_0^{(0)}\right)^- = S^- \quad \text{and} \quad S_1^{(1)} = \left(S_0^{(0)}\right)^+ = S^+. \quad (3)$$

Applied recursively, this process leads to the sequence of memoryless sources  $(S_\mu^{(i)})_{\mu \in \mathbb{N}, i \in \llbracket 0, 2^\mu - 1 \rrbracket}$ , where  $S_\mu^{(i)}$  takes its values in a set  $\mathcal{B} \times (\mathcal{Y}^{2^\mu} \times \mathcal{B}^{K(i)})$  with  $K(i) \in \llbracket 0, 2^\mu - 1 \rrbracket$  and is defined by

$$S_{\mu+1}^{(i)} = \begin{cases} \left(S_\mu^{(\lfloor i/2 \rfloor)}\right)^- & \text{if } i \text{ is even} \\ \left(S_\mu^{(\lfloor i/2 \rfloor)}\right)^+ & \text{if } i \text{ is odd.} \end{cases} \quad (4)$$

Let us introduce the sources’ conditional entropies expressed in bits:

$$H(S) = \mathbb{H}(X_1 | Y_1) = \mathbb{H}(X_2 | Y_2), \quad (5)$$

$$H(S^-) = \mathbb{H}(X_1 \oplus X_2 | Y_1, Y_2), \quad (6)$$

$$H(S^+) = \mathbb{H}(X_2 | Y_1, Y_2, X_1 \oplus X_2). \quad (7)$$

For any  $m \in \mathbb{D}$  ( $m = 2^\mu$  with  $\mu \in \mathbb{N}$ ) and for any  $\theta \in ]0, \frac{1}{2}]$ , let

$$\mathcal{H}_{X|Y} = \mathcal{H}_{X|Y}(\theta) = \mathcal{H}_{X|Y}^{(m)}(\theta) = \{i \in \llbracket 0, m - 1 \rrbracket : H(S_\mu^{(i)}) > \theta\} \quad (8)$$

$$\mathcal{V}_{X|Y} = \mathcal{V}_{X|Y}(\theta) = \mathcal{V}_{X|Y}^{(m)}(\theta) = \{i \in \llbracket 0, m - 1 \rrbracket : H(S_\mu^{(i)}) > 1 - \theta\}. \quad (9)$$

For any memoryless source  $S = (X, Y) \simeq P_{X,Y}$ , we introduce its Bhattacharyya parameter:

$$\begin{aligned} Z(S) &= 2 \sum_{y \in \mathcal{Y}} \sqrt{P_{X,Y}(0, y) P_{X,Y}(1, y)} \\ &= \sqrt{4 P_X(0) P_X(1)} \sum_{y \in \mathcal{Y}} \sqrt{P_{Y|X}(y | 0) P_{Y|X}(y | 1)} \end{aligned} \quad (10)$$

which is the inner product between the unit vectors whose components are the square root of the distributions  $P_{Y|X=0}$  and  $P_{Y|X=1}$ , under equiprobability  $P_X(0) = P_X(1) = \frac{1}{2}$ . This

quantity informs about the similarity between the side-information  $Y$  when  $X$  is 0 and 1, under equiprobability  $P_X(0) = P_X(1) = \frac{1}{2}$ .

Let

$$h(x) = -x \log x - (1-x) \log(1-x) \quad (11)$$

be the entropy function expressed in bits, which admits an inverse  $h^{-1} : [0, 1] \mapsto [0, \frac{1}{2}]$  when we restrict  $x$  to be in  $[0, \frac{1}{2}]$ .

**Proposition 1.1 (Properties of Bhattacharyya parameter)** *Let  $(X, Y) \simeq P_{X,Y}$  be an arbitrary pair of random variables over  $\mathcal{B} \times \mathcal{Y}$  with  $\mathcal{B} = \{0, 1\}$  and  $\mathcal{Y}$  an arbitrary countable set. For any memoryless source  $S = (X, Y) \simeq P_{X,Y}$ , with  $X$  as the part to be compressed and  $Y$  in the role of “side-information” about  $X$ , we have*

$$Z(S)^2 \leq H(S) \leq \log(1 + Z(S)) \quad (12)$$

$$Z(S^+) = Z(S)^2 \quad \text{and} \quad \sqrt{2Z(S)^2 - Z(S)^4} \leq Z(S^-) \leq 2Z(S) \quad (13)$$

The proof of the left inequality in (13) can be found in the paper<sup>1</sup> by Chou *et al.* and the proofs of Proposition 1.1 and Theorem 1.2 can be find in the paper by Şaşoğlu<sup>2</sup>.

**Theorem 1.2 (Şaşoğlu)** *Let  $(X_1, Y_1)$  and  $(X_2, Y_2)$  be independent pairs of discrete random variables taking their values in  $\mathcal{B} \times \mathcal{Y}_1$  and respectively in  $\mathcal{B} \times \mathcal{Y}_2$  with  $\mathcal{B} = \{0, 1\}$ , and let  $\mathbb{H}(X_1 | Y_1) = \alpha$  and  $\mathbb{H}(X_2 | Y_2) = \beta$ . Then, the conditional entropy  $\mathbb{H}(X_1 \oplus X_2 | Y_1, Y_2)$  is minimized when  $\mathbb{H}(X_1 | Y_1 = y_1) = \alpha$  and  $\mathbb{H}(X_2 | Y_2 = y_2) = \beta$  for all  $(y_1, y_2) \in \mathcal{Y}_1 \times \mathcal{Y}_2$  such that  $P_{Y_1}(y_1)P_{Y_2}(y_2) > 0$ . Moreover, if  $\beta = \alpha = h(x)$  with  $x \in [0, \frac{1}{2}]$  and if  $0 < \alpha < 1$ , then*

$$\min(\mathbb{H}(X_1 \oplus X_2 | Y_1, Y_2) - \mathbb{H}(X_1 | Y_1)) = h(2x(1-x)) - h(x) > 0, \quad (14)$$

where the minimum in (14) is taken on the set  $\{P_{X_1 Y_1}, P_{X_2 Y_2} : \mathbb{H}(X_1 | Y_1) = \mathbb{H}(X_2 | Y_2) = \alpha\}$ .

Finally, let us introduce

$$Z'(S) = 1 - Z(S)^2. \quad (15)$$

The next proposition results straightforwardly from Proposition 1.1 and definition (15).

**Proposition 1.3** *For any memoryless source  $S$  with binary part to be compressed and discrete “side-information”, we have*

$$Z'(S^+) = 2Z'(S) - Z'(S)^2 \quad \text{and} \quad Z'(S^-) \leq Z'(S)^2. \quad (16)$$

## 2 Rough polarization

The following corollaries and theorems are adaptations to source polarization of results given by Guruswami and Xia<sup>3</sup> for channel polarization.

**Corollary 2.1 (Guruswami & Xia)** *There exists a constant  $\theta_0$  with  $0.799 < \theta_0 < 0.8$  such that for any memoryless source  $S$  with binary-part to compress and discrete side-information,*

$$H(S^-) - H(S) = H(S) - H(S^+) \geq \theta_0 H(S)(1 - H(S)). \quad (17)$$

<sup>1</sup>The left inequality in (13) corresponds to Lemma 16 in “Polar coding for secret-key generation”, Rémi Chou, Matthieu Bloch and Emmanuel Abbe, *IEEE Trans. on Information Theory*, vol. 61, no. 11, pp. 6213–6237, 2015.

<sup>2</sup>Proposition 1.1 corresponds to Proposition 2.8 and Lemma 2.9 and Theorem 1.2 corresponds to Lemma 2.2 in “Polarization and polar codes”, Eren Şaşoğlu, *Foundations and Trends in Communications and Information Theory*, vol. 8, no. 4, pp. 259–381, 2011.

<sup>3</sup>Corollary 2.1, Theorem 2.3, Corollary 2.4 and Theorem 2.8 correspond respectively to Lemma 6, Lemma 8, Corollary 9 and Proposition 5 in “Polar codes: speed of polarization and polynomial gap to capacity”, by Venkatesan Guruswami and Patrick Xia, *IEEE Transactions on Information Theory*, vol. 61, no. 1, pp. 3–16, 2015.

**Proof.** We write  $S = \{(X_i, Y_i) : i \in \mathbb{N}^*\}$ , a sequence of independent drawings from  $(X, Y) \simeq P_{X,Y}$ , as in Section 1. According to the definitions of  $H(S^-)$  and  $H(S)$ , we have

$$H(S^-) - H(S) = H(X_1 \oplus X_2 | Y_1, Y_2) - H(X_1 | Y_1). \quad (18)$$

Using the entropy function  $h$  defined in equation (11) and setting  $H(X_1 | Y_1) = H(X_2 | Y_2) = h(x)$ , with  $x \in [0, \frac{1}{2}]$ , it results from Theorem 1.2 that

$$H(S^-) - H(S) \geq h(2x(1-x)) - h(x). \quad (19)$$

Therefore

$$\frac{H(S^-) - H(S)}{H(S)(1 - H(S))} \geq \frac{h(2x(1-x)) - h(x)}{h(x)(1 - h(x))} \geq \min_{x \in [0, \frac{1}{2}]} \frac{h(2x(1-x)) - h(x)}{h(x)(1 - h(x))} = \theta_0 \quad (20)$$

and numerical simulations give  $0.799 < \theta_0 < 0.8$ . In order to end the proof, let us remark that the transformation  $(X_1, X_2) \mapsto (X_1 \oplus X_2, X_2)$  is invertible, hence  $H(S^+) + H(S^-) = 2H(S)$ , i.e.,  $H(S) - H(S^+) = H(S^-) - H(S)$ .  $\diamond$

**Remark 2.1** *It results from Theorem 1.2 and its proof that for any  $x \in [0, \frac{1}{2}]$ , the inequality (19) can be an equality, hence the constant  $\theta_0$  is the greatest value  $\theta \in \mathbb{R}$  such that  $H(S^-) - H(S) \geq \theta H(S)(1 - H(S))$  for any memoryless source  $S$  with binary-part to compress and discrete side-information.*

**Lemma 2.2** *The function*

$$\begin{aligned} g : [0, 1] &\rightarrow [0, \frac{1}{2}] \\ \eta &\mapsto \sqrt{\eta(1-\eta)} \end{aligned} \quad (21)$$

*is strictly concave and for any  $\eta \in ]0, 1[$ , the function*

$$\begin{aligned} G_\eta : [0, \min(\eta, 1-\eta)] &\rightarrow [0, 1] \\ \delta &\mapsto \frac{g(\eta+\delta) + g(\eta-\delta)}{2g(\eta)} \end{aligned} \quad (22)$$

*is strictly decreasing.*

**Proof.** The functions  $g$  and  $G_\eta$  are well defined for any  $\eta \in ]0, 1[$ . Moreover, the two first derivatives of  $g$  are

$$g'(\eta) = \frac{1-2\eta}{2g(\eta)} \quad \text{and} \quad g''(\eta) = \frac{-1}{g(\eta)} \left[ 1 + \frac{(1-2\eta)^2}{4\eta(1-\eta)} \right] < 0 \quad (23)$$

hence  $g$  is strictly concave and finally for any  $\eta \in ]0, 1[$  and  $\delta \in [0, \min(\eta, 1-\eta)]$

$$G'_\eta(\delta) = \frac{g'(\eta+\delta) - g'(\eta-\delta)}{2g(\eta)} \leq 0, \quad (24)$$

with equality if and only if  $\delta = 0$ , which completes the proof.  $\diamond$

**Theorem 2.3 (Guruswami & Xia)** *Let  $g$  be the function defined in (21). There exists a constant  $\Lambda < 1$ , with  $0.9165 < \Lambda < 0.9166$ , such that for any memoryless source  $S$  with binary-part to compress and discrete side-information*

$$\frac{1}{2} [g(H(S^-)) + g(H(S^+))] \leq \Lambda g(H(S)). \quad (25)$$

**Proof.** For a memoryless source  $S$  with binary-part to compress and discrete side-information, let  $\eta = H(S)$ ,  $\varepsilon_0(\eta) = \theta_0\eta(1 - \eta)$ , where  $\theta_0$  has been introduced in Corollary 2.1 and  $\varepsilon = H(S^-) - H(S) = H(S) - H(S^+)$ . It results from Corollary 2.1 that  $\varepsilon \geq \varepsilon_0(\eta)$ , which implies, according to Lemma 2.2, that

$$\begin{aligned} \frac{g(H(S^-)) + g(H(S^+))}{2g(H(S))} &= \frac{g(\eta + \varepsilon) + g(\eta - \varepsilon)}{2g(\eta)} \\ &\leq \frac{g(\eta + \varepsilon_0(\eta)) + g(\eta - \varepsilon_0(\eta))}{2g(\eta)} \\ &= \frac{1}{2} \left( \sqrt{A_{\theta_0}(\eta)} + \sqrt{A_{\theta_0}(1 - \eta)} \right) \end{aligned} \quad (26)$$

with  $A_{\theta_0}(\eta) = [1 + \theta_0(1 - \eta)](1 - \theta_0\eta) = \theta_0^2(\eta - \theta_0^{-1})[\eta - (1 + \theta_0^{-1})]$ . The two roots of polynomial  $A_{\theta_0}(\eta)$  are both outside the interval  $[0, 1]$ , therefore the function  $\eta \mapsto \sqrt{A_{\theta_0}(\eta)}$  is strictly convex for  $\eta \in [0, 1]$ . As a result, its derivative is injective and the term (26) is maximum for  $\eta \in [0, 1]$  if and only if

$$\frac{A'_{\theta_0}(\eta)}{\sqrt{A_{\theta_0}(\eta)}} = \frac{A'_{\theta_0}(1 - \eta)}{\sqrt{A_{\theta_0}(1 - \eta)}}, \quad (27)$$

i.e., if and only if  $\eta = \frac{1}{2}$ . Hence, it comes

$$\begin{aligned} \frac{g(H(S^-)) + g(H(S^+))}{2g(H(S))} &\leq \frac{1}{2} \sqrt{[1 + \theta_0(1 - \eta)](1 - \theta_0\eta)} + \frac{1}{2} \sqrt{[1 - \theta_0(1 - \eta)](1 + \theta_0\eta)} \Big|_{\eta=\frac{1}{2}} \\ &= \sqrt{1 - \frac{\theta_0^2}{4}} = \Lambda. \end{aligned} \quad (28)$$

Numerical simulations give  $0.9165 < \Lambda < 0.9166$ .  $\diamond$

A recursive application of Theorem 2.3 gives

$$\forall \mu \in \mathbb{N}, \quad \frac{1}{2^\mu} \sum_{i=0}^{2^\mu-1} g[H(S_\mu^{(i)})] \leq \Lambda^\mu g[H(S)] \leq \Lambda^\mu \max_{\eta \in [0, 1]} g(\eta) = \frac{1}{2} \Lambda^\mu. \quad (29)$$

This last equation can be interpreted as

$$\mathbb{E} \{ g[H(S_\mu^{(J)})] \} \leq \frac{1}{2} \Lambda^\mu, \quad (30)$$

where  $J$  is a uniform random variable over  $\llbracket 0, 2^\mu - 1 \rrbracket$ . Hence, the next corollary results from Markov's inequality.

**Corollary 2.4 (Guruswami & Xia)** *For any memoryless source  $S$ , with binary-part to compress and discrete side-information, and the associated sequence introduced in equation (4), for any  $\mu \in \mathbb{N}$ , if  $J$  is a uniform random variable over  $\llbracket 0, 2^\mu - 1 \rrbracket$ , then*

$$\forall \theta > 0, \quad \mathbb{P}(g^2[H(S_\mu^{(J)})] \geq \theta) \leq \frac{\Lambda^\mu}{2\sqrt{\theta}}. \quad (31)$$

We conclude this section by proving an adaptation to source polarization of the Guruswami and Xia rough (channel) polarization theorem. For any  $\theta \in ]0, \frac{1}{2}]$ , let

$$x_1 = x_1(\theta) = \frac{1 - \sqrt{1 - 2\theta}}{2} \quad \text{and} \quad x_2 = x_2(\theta) = \frac{1 + \sqrt{1 - 2\theta}}{2} = 1 - x_1 \quad (32)$$

be the solutions of  $x(1 - x) = \frac{\theta}{2}$ . We have  $0 \leq x_1 \leq \frac{1}{2} \leq x_2 \leq 1$  and

$$\left\{ x \in [0, 1] : x(1 - x) \geq \frac{\theta}{2} \right\} = [x_1(\theta), x_2(\theta)]. \quad (33)$$

Moreover,  $0 \leq 1 - 2\theta \leq \sqrt{1 - 2\theta} \leq 1$  implies  $x_1(\theta) \leq \theta$ . Hence, for any  $m \in \mathbb{D}$  ( $m = 2^\mu$ ), for any  $\theta \in ]0, \frac{1}{2}[$  and for any memoryless source  $S$  with binary-part to compress and discret side-information, we have

$$\begin{aligned} \left\{ i \in \llbracket 0, m-1 \rrbracket : g^2 [H(S_\mu^{(i)})] < \frac{\theta}{2} \right\} &= \{ i \in \llbracket 0, m-1 \rrbracket : H(S_\mu^{(i)}) \in [0, x_1[\cup]x_2, 1] \} \\ &\subset \mathcal{V}_{X|Y}(x_1) \cup \mathcal{H}_{X|Y}^c(x_1) \end{aligned} \quad (34)$$

and the following partition of  $\llbracket 0, m-1 \rrbracket$ :

$$\llbracket 0, m-1 \rrbracket = \mathcal{V}_{X|Y}(x_1) \cup \mathcal{H}_{X|Y}^c(x_1) \cup [\mathcal{V}_{X|Y}^c(x_1) \cap \mathcal{H}_{X|Y}(x_1)], \quad (35)$$

implies, by setting  $A = \mathcal{V}_{X|Y}(x_1)$ ,  $B = \mathcal{H}_{X|Y}^c(x_1)$  and  $C = \mathcal{V}_{X|Y}^c(x_1) \cap \mathcal{H}_{X|Y}(x_1)$ ,

$$\begin{aligned} 1 - H(S) &= 1 - \frac{1}{m} \sum_{i=0}^{m-1} H(S_\mu^{(i)}) \\ &= \frac{1}{m} \left[ \sum_{i \in A} (1 - H(S_\mu^{(i)})) + \sum_{i \in B} (1 - H(S_\mu^{(i)})) + \sum_{i \in C} (1 - H(S_\mu^{(i)})) \right] \end{aligned} \quad (36)$$

$$\leq \frac{|A|}{m} \left( 1 - \min \{ H(S_\mu^{(i)}) : i \in \mathcal{V}_{X|Y}(x_1) \} \right) + \frac{|B| + |C|}{m} \quad (37)$$

$$\leq x_1(\theta) + \frac{|B| + |C|}{m} \leq \theta + \frac{|B|}{m} + \mathbb{P}(J \in C), \quad (38)$$

where  $J$  is a random variable uniformly distributed over  $\llbracket 0, m-1 \rrbracket$ . Now, the contraposition of (34) gives

$$C \subset \left\{ i \in \llbracket 0, m-1 \rrbracket : g^2 [H(S_\mu^{(i)})] \geq \frac{\theta}{2} \right\}, \quad (39)$$

hence it results from Corollary 2.4 that

$$\mathbb{P}(J \in C) \leq \frac{\Lambda^\mu}{2\sqrt{\theta/2}}, \quad (40)$$

and this implies, with inequality (38) where  $\frac{|B|}{m} = \mathbb{P}(J \in \mathcal{H}_{X|Y}^c(x_1))$ , that

$$\mathbb{P}(J \in \mathcal{H}_{X|Y}^c(x_1)) \geq 1 - H(S) - \theta - \frac{\Lambda^\mu}{2\sqrt{\theta/2}}. \quad (41)$$

**Proposition 2.5** *There exists  $\Lambda \in ]0, 1[$  such that for any  $\theta \in ]0, \frac{1}{2}[$ , for any memoryless source  $S$  with binary-part to compress and discrete side-information, for any  $m \in \mathbb{D}$  ( $m = 2^\mu$ ), the subsets defined in equations (8-9) satisfy*

$$\frac{|\mathcal{H}_{X|Y}(\theta) \cap \mathcal{V}_{X|Y}^c(\theta)|}{m} \leq \frac{\sqrt{2}\Lambda^\mu}{2\sqrt{\theta}} \quad (42)$$

$$H(S) - \theta \leq \frac{|\mathcal{H}_{X|Y}(\theta)|}{m} \leq H(S) + \theta + \frac{\sqrt{2}\Lambda^\mu}{2\sqrt{\theta}} \quad (43)$$

$$H(S) - \theta - \frac{\sqrt{2}\Lambda^\mu}{2\sqrt{\theta}} \leq \frac{|\mathcal{V}_{X|Y}(\theta)|}{m} \leq H(S) + \theta. \quad (44)$$

**Proof.** Since  $x_1 = x_1(\theta) \leq \theta$ , we have  $\mathcal{H}_{X|Y}^c(x_1) \subset \mathcal{H}_{X|Y}^c(\theta)$  and  $\mathcal{V}_{X|Y}(x_1) \subset \mathcal{V}_{X|Y}(\theta)$ . Therefore: firstly  $\mathcal{H}_{X|Y}(\theta) \cap \mathcal{V}_{X|Y}^c(\theta) \subset \mathcal{H}_{X|Y}(x_1) \cap \mathcal{V}_{X|Y}^c(x_1)$  and inequality (42) results from (40);

secondly  $|\mathcal{H}_{X|Y}^c(x_1)| \leq |\mathcal{H}_{X|Y}^c(\theta)|$  and the right inequality in (43) comes directly from (41). Furthermore, the conditions  $\max_{i \in \mathcal{H}_{X|Y}^c(\theta)} H(S_\mu^{(i)}) \leq \theta$  and  $\max_{i \in \mathcal{H}_{X|Y}(\theta)} H(S_\mu^{(i)}) \leq 1$  give

$$H(S) = \frac{1}{m} \sum_{i=0}^{m-1} H(S_\mu^{(i)}) \leq \theta \mathbb{P}[J \in \mathcal{H}_{X|Y}^c(\theta)] + \mathbb{P}[J \in \mathcal{H}_{X|Y}(\theta)] \leq \theta + \frac{|\mathcal{H}_{X|Y}(\theta)|}{m}, \quad (45)$$

which proves the left inequality in (43). Similarly, condition  $\min_{i \in \mathcal{V}_{X|Y}(\theta)} H(S_\mu^{(i)}) \geq 1 - \theta$  implies

$$H(S) \geq (1 - \theta) \mathbb{P}[J \in \mathcal{V}_{X|Y}(\theta)] \geq \frac{|\mathcal{V}_{X|Y}(\theta)|}{m} - \theta, \quad (46)$$

which proves the right inequality in (44). Finally, note that  $\mathcal{V}_{X|Y}(\theta) \subset \mathcal{H}_{X|Y}(\theta)$  implies  $\mathcal{V}_{X|Y}(\theta) = \mathcal{H}_{X|Y}(\theta) \setminus [\mathcal{H}_{X|Y}(\theta) \cap \mathcal{V}_{X|Y}^c(\theta)]$ , so the left inequality in (44) results from (42–43).  $\diamond$

Let us now consider  $\rho \in ]0, 1[$  and  $\mu \in \mathbb{N}^*$  such that  $4\rho^{2\mu} < \frac{1}{2}$ , i.e.,  $\mu > \frac{3}{2\log(1/\rho)}$ . For any memoryless source  $S$  with binary-part to compress and discrete side-information, since according to Proposition 1.1 for all  $i \in \llbracket 0, 2^\mu - 1 \rrbracket$ ,  $Z(S_\mu^{(i)}) \leq \sqrt{H(S_\mu^{(i)})}$ , we have

$$\{i \in \llbracket 0, 2^\mu - 1 \rrbracket : H(S_\mu^{(i)}) \leq 4\rho^{2\mu}\} \subset \{i \in \llbracket 0, 2^\mu - 1 \rrbracket : Z(S_\mu^{(i)}) \leq 2\rho^\mu\}, \quad (47)$$

$$\{i \in \llbracket 0, 2^\mu - 1 \rrbracket : H(S_\mu^{(i)}) \leq x_1(4\rho^{2\mu})\} \subset \{i \in \llbracket 0, 2^\mu - 1 \rrbracket : H(S_\mu^{(i)}) \leq 4\rho^{2\mu}\}; \quad (48)$$

therefore with  $\theta = 4\rho^{2\mu}$  in (41), we obtain the following Proposition.

**Proposition 2.6** *With the notations introduced in this subsection, for any  $\rho \in ]0, 1[$ , for any integer  $\mu > \frac{3}{2\log(1/\rho)}$  we have*

$$\mathbb{P}(Z(S_\mu^{(J)}) \leq 2\rho^\mu) \geq 1 - H(S) - 4\rho^{2\mu} - \frac{1}{2\sqrt{2}} \left(\frac{\Lambda}{\rho}\right)^\mu, \quad (49)$$

where  $J$  is a random variable uniformly distributed over  $\llbracket 0, 2^\mu - 1 \rrbracket$ .

Let us remark that

$$\forall \theta \in \left[0, \frac{\sqrt{5}-1}{2}\right], \quad \sqrt{1-\theta} \leq 1 - \theta^2 \quad (50)$$

and for any  $\rho \in ]0, 1[$ , for any  $\mu \in \mathbb{N}$  such that

$$\mu > \frac{2 - \log(\sqrt{5}-1)}{\log(1/\rho)} \simeq \frac{1.69}{\log(1/\rho)} \quad \text{i.e.,} \quad 2\rho^\mu < \frac{\sqrt{5}-1}{2}, \quad (51)$$

we have

$$\log\left(\frac{1}{1-2\rho^{2\mu}}\right) < \frac{1}{2} \quad \text{i.e.,} \quad \mu > \left[\frac{3}{4} - \frac{\log(\sqrt{2}-1)}{2}\right] \frac{1}{\log(1/\rho)} \simeq \frac{1.38}{\log(1/\rho)}, \quad (52)$$

and it results from the right inequality in (12) that

$$\left(H(S) > \log(2 - 4\rho^{2\mu})\right) \Rightarrow \left(1 + Z(S) > 2 - 4\rho^{2\mu}\right). \quad (53)$$

Now,  $\log(2 - 4\rho^{2\mu}) = 1 - \log[(1 - 2\rho^{2\mu})^{-1}]$ , moreover  $1 + Z(S) > 2 - 4\rho^{2\mu}$  if and only if  $Z(S) > 1 - 4\rho^{2\mu}$  and  $1 - 4\rho^{2\mu} \geq \sqrt{1 - 2\rho^\mu}$  according to (50–51), hence

$$\left(H(S) > 1 - \log\left[\frac{1}{1 - 2\rho^{2\mu}}\right]\right) \Rightarrow \left(Z(S) > \sqrt{1 - 2\rho^\mu}\right) \quad \text{i.e.,} \quad Z'(S) = 1 - Z(S)^2 < 2\rho^\mu. \quad (54)$$

Finally,

$$1 - \log\left[\frac{1}{1 - 2\rho^{2\mu}}\right] = 1 + \frac{\ln(1 - 2\rho^{2\mu})}{\ln 2} \leq 1 - \frac{2\rho^{2\mu}}{\ln 2}. \quad (55)$$

Therefore the next proposition results from the left inequality in (44).

**Proposition 2.7** *With the notations introduced in this subsection, for any  $\rho \in ]0, 1[$ , for any integer  $\mu > \frac{2 - \log(\sqrt{5}-1)}{\log(1/\rho)}$  we have*

$$\mathbb{P}(Z'(S_\mu^{(J)}) < 2\rho^\mu) \geq H(S) - \frac{2}{\ln 2} \rho^{2\mu} - \frac{\sqrt{\ln 2}}{2} \left(\frac{\Lambda}{\rho}\right)^\mu, \quad (56)$$

where  $J$  is a random variable uniformly distributed over  $\llbracket 0, 2^\mu - 1 \rrbracket$ .

%%%%%%%%%

We add this paragraph to prove the Rough polarization theorem.

Let  $\rho \in ]\Lambda, 1[$  and  $\varepsilon \in ]0, \frac{1}{2}[$ ; let

$$b_\rho = \max\left(\frac{2}{\ln(1/\rho)}, \frac{1}{\ln(\rho/\Lambda)}\right), \quad (57)$$

and let  $\mu \in \mathbb{N}$  such that  $\mu > b_\rho \ln(1/\varepsilon)$ . Then, we have  $\frac{\ln(1/\varepsilon) - (\ln 2)/2}{\ln(\rho/\Lambda)} < \frac{\ln(1/\varepsilon)}{\ln(\rho/\Lambda)} \leq b_\rho \ln(1/\varepsilon) < \mu$  and  $\frac{\ln(1/\varepsilon) + 3\ln 2}{2\ln(1/\rho)} \leq \frac{4\ln(1/\varepsilon)}{2\ln(1/\rho)} \leq b_\rho \ln(1/\varepsilon) < \mu$ , which imply

$$\frac{1}{2\sqrt{2}} \left(\frac{\Lambda}{\rho}\right)^\mu < \frac{\varepsilon}{2} \quad \text{and} \quad 4\rho^{2\mu} < \frac{\varepsilon}{2}, \quad \text{hence} \quad 4\rho^{2\mu} + \frac{1}{2\sqrt{2}} \left(\frac{\Lambda}{\rho}\right)^\mu < \varepsilon. \quad (58)$$

We proved the following theorem by Guruswami and Xia.

**Theorem 2.8 (Rough polarization)** *There exists  $\Lambda \in ]0, 1[$  such that for any  $\rho \in ]\Lambda, 1[$ , there exists  $b_\rho > 0$  such that for any memoryless source  $S$  with binary-part to compress and discrete side-information, for any  $\varepsilon \in ]0, \frac{1}{2}[$  and for any  $\mu \in \mathbb{N}$ , such that  $\mu > b_\rho \ln(1/\varepsilon)$ , there exists a roughly polarized set*

$$\mathcal{S}_r \subset \{S_\mu^{(i)} : 0 \leq i < 2^\mu\} \quad (59)$$

such that for any  $M \in \mathcal{S}_r$ ,  $Z(M) \leq 2\rho^\mu$  and  $\mathbb{P}(S_\mu^{(J)} \in \mathcal{S}_r) \geq 1 - H(S) - \varepsilon$ , where  $J$  is a random variable uniformly distributed over  $\llbracket 0, 2^\mu - 1 \rrbracket$ .

%%%%%%%%%

### 3 Fine polarization

This section is an adaptation of the reasoning given by Guruswami and Xia (see footnote 3) to prove their fine polarization theorem.

#### 3.1 Preliminaries

**Lemma 3.1** *For any  $\beta \in ]0, \frac{1}{2}[$ , the function  $\zeta : \mathbb{R}_+^* \rightarrow \mathbb{R}_+$  defined by*

$$\zeta(y) = \frac{\lfloor y \rfloor}{2y} + \frac{2\beta^2 y}{\lceil y \rceil} = \begin{cases} \frac{1+4\beta^2}{2} & \text{if } y \in \mathbb{N}^* \\ \frac{q}{2(q+\alpha)} + \frac{2\beta^2(q+\alpha)}{q+1} & \text{if } y = q + \alpha \text{ with } q \in \mathbb{N} \text{ and } 0 < \alpha < 1, \end{cases} \quad (60)$$

satisfies the condition:

$$\forall y, \quad \left( \lfloor y \rfloor \geq \frac{4\beta^2}{1-4\beta^2} \Rightarrow \min\{\zeta(\lfloor y \rfloor + \alpha) : \alpha \in [0, 1]\} = \frac{\lfloor y \rfloor}{2(\lfloor y \rfloor + 1)} + 2\beta^2 \right). \quad (61)$$

**Proof.** For  $q \in \mathbb{N}^*$ , let us introduce the continuously differentiable function of  $\alpha$

$$\begin{aligned} f_q : \mathbb{R}_+ &\rightarrow \mathbb{R}_+^* \\ \alpha &\mapsto \frac{q}{2(q+\alpha)} + \frac{2\beta^2(q+\alpha)}{q+1}, \end{aligned} \quad (62)$$

which satisfies  $f_q(\alpha) = \zeta(q + \alpha)$  ( $\forall \alpha \in ]0, 1[$ ) and

$$f_q(0) = \frac{1}{2} + 2\beta^2 \frac{q}{q+1} < \frac{1}{2} + 2\beta^2 \quad \text{and} \quad f_q(1) = \frac{q}{2(q+1)} + 2\beta^2 < \frac{1}{2} + 2\beta^2, \quad (63)$$

$$f'_q(\alpha) = \frac{2\beta^2}{q+1} - \frac{q}{2(q+\alpha)^2} \quad \text{and} \quad f'_q(\alpha) = 0 \Leftrightarrow \alpha = \frac{\sqrt{q(q+1)}}{2\beta} - q. \quad (64)$$

Let us remark that  $\beta \in ]0, \frac{1}{2}[$  implies  $f'_q(0) = \frac{-1}{2q} + \frac{2\beta^2}{q+1} < 0$  and the zero of the derivative function is always greater than zero. Moreover, the zero of the derivative function is smaller than 1 if and only if

$$\frac{q(q+1)}{4\beta^2} < (q+1)^2 \Leftrightarrow q < \frac{4\beta^2}{1-4\beta^2}. \quad (65)$$

Hence, if  $\lfloor y \rfloor = q \geq \frac{4\beta^2}{1-4\beta^2}$ , then  $\min\{f_q(\alpha) : \alpha \in [0, 1]\} = f_q(1) = \frac{\lfloor y \rfloor}{2(\lfloor y \rfloor + 1)} + 2\beta^2$ .  $\diamond$

The proofs of the following three lemmas are straightforward.

**Lemma 3.2** *The function*

$$\begin{aligned} \zeta : \mathbb{R}_+ &\rightarrow \mathbb{R}_- \\ y &\mapsto -\alpha_0 2^y + y \end{aligned} \quad \text{with} \quad \alpha_0 = \frac{2}{e \ln 2} \simeq 1.06 \quad (66)$$

is maximum at the point  $y_0 = \frac{-\ln(\alpha_0 \ln 2)}{\ln 2} = \frac{1}{\ln 2} - 1 \simeq 0.44$  and  $\zeta(y_0) = -1$ .

**Lemma 3.3** *For any  $\beta \in ]0, \frac{1}{2}[$ , the function*

$$\begin{aligned} \varphi : \mathbb{R}_+^* &\rightarrow \mathbb{R}_+^* \\ y &\mapsto \frac{1-\beta+y^{-1}}{1-2^{-\beta y}} \end{aligned} \quad (67)$$

is strictly decreasing,  $\varphi(1/\beta) = 2$  and  $\varphi(y)$  approaches to  $1 - \beta < 1$  when  $y$  approaches to infinity. Hence, there exists  $c_\beta > 0$  such that

$$\forall y, (y \geq c_\beta \Rightarrow \varphi(y) < 1). \quad (68)$$

**Lemma 3.4**  $\forall \beta \in ]0, \frac{1}{2}[$ ,  $\forall \gamma \in \mathbb{R}_+^*$ ,  $\forall \xi > 1$  and  $\forall \rho \in ]0, 1[$  the function

$$\begin{aligned} \psi : \mathbb{R}_+ &\rightarrow \mathbb{R}_+^* \\ y &\mapsto \sqrt{e} \left( 1 + \frac{\gamma \xi}{\log(1/\rho)} \right) \exp \left[ \frac{-(1-2\beta)^2 y}{2} \right] \end{aligned} \quad (69)$$

is strictly decreasing on  $\mathbb{R}_+$ ,  $\psi(0) > 1$  and  $\psi(y)$  approaches to 0 when  $y$  approaches to infinity.

### 3.2 Introduction of parameters, constants and notations

Let  $\delta \in ]0, \frac{1}{2}[$  and  $\beta \in ]\delta, \frac{1}{2}[$  such that  $\gamma = \frac{\delta}{\beta-\delta}$  is a rational number. We put  $\gamma = \frac{\gamma_n}{\gamma_d}$  with  $\gamma_n$  and  $\gamma_d$  co-prime integers ( $\gamma$  can take any value in  $\mathbb{Q}_+^*$ ).

Let  $\rho \in ]\Lambda, 1[$ ,  $\xi > 1$  (the  $x$  parameter used by Guruswami and Xia is connected to  $\xi$  with the relation  $x = \frac{\log(1/\rho)}{\xi \log(2/\rho)}$ ) and

$$c = \left\lceil \frac{\gamma \xi}{\log(1/\rho)} \right\rceil. \quad (70)$$



Using the constant  $c_\beta$  introduced in lemma 3.3, let

$$c'_\beta = \left( \frac{\xi}{\log(1/\rho)} + \frac{1}{\gamma} \right) \max \left\{ c_\beta, \frac{1}{(1-2\beta)} \right\}, \quad (71)$$

$$c_\delta = \max \left( \frac{(1+\alpha_0)\xi}{(\xi-1)\log(1/\rho)}, c'_\beta \right). \quad (72)$$

Let  $\mu$  be a natural integer multiple of  $\gamma_d$  such that

$$\mu > c_\delta. \quad (73)$$

Finally, let us introduce

$$\nu = \gamma\mu \quad \text{and} \quad \nu_0 = (\gamma+1)\mu = \nu + \mu, \quad (74)$$

which are natural integers because  $\mu$  is a multiple of  $\gamma_d$ .

For any  $j \in \llbracket 1, c \rrbracket$ , let us note  $I_j = \left[ \frac{(j-1)\nu}{c}, \frac{j\nu}{c} \right[ \cap \mathbb{N}$ ,  $n_j = |I_j|$  and

$$G_j(\nu) = \left\{ i = \sum_{k=0}^{\nu-1} b_k 2^k : \sum_{k \in I_j} b_k \geq \frac{\beta\nu}{c} \right\}, \quad G'_j(\nu) = \left\{ i = \sum_{k=0}^{\nu-1} b_k 2^k : \sum_{k \in I_j} (1 - b_k) \geq \frac{\beta\nu}{c} \right\} \quad (75)$$

where  $b_0, \dots, b_{\nu-1}$  are the binary digits of  $i$ . It comes

$$\left\lfloor \frac{\nu}{c} \right\rfloor \leq n_j \leq \left\lceil \frac{\nu}{c} \right\rceil \quad \text{and} \quad \sum_{j=1}^c n_j = \nu. \quad (76)$$

Finally, let us put

$$G(\nu) = \bigcap_{j=1}^c G_j(\nu) \quad \text{and} \quad G'(\nu) = \bigcap_{j=1}^c G'_j(\nu). \quad (77)$$

### 3.3 Proof of the fine polarization theorem

**Lemma 3.5 (Guruswami & Xia)** *With the notations introduced in the previous subsections, if  $J_2$  is a random variable with uniform distribution over  $\llbracket 0, 2^\nu - 1 \rrbracket$ , then*

$$\mathbb{P}(J_2 \in G(\nu)) \geq 1 - \psi\left(\frac{\nu}{c}\right), \quad (78)$$

$$\mathbb{P}(J_2 \in G'(\nu)) \geq 1 - \psi\left(\frac{\nu}{c}\right). \quad (79)$$

**Proof.** If we write  $J_2 = \sum_{k=0}^{\nu-1} B_k 2^k$ , then the  $\nu$  bits  $B_k$  are independent Bernoulli random variables with parameter  $\frac{1}{2}$ . If  $J_2$  takes its values in  $G_j(\nu)$ , we have

$$\sum_{k \in I_j} B_k - \frac{n_j}{2} \geq - \left( \frac{n_j}{2} - \frac{\beta\nu}{c} \right). \quad (80)$$

Moreover

$$\frac{n_j}{2} - \frac{\beta\nu}{c} \geq \frac{1}{2} \left\lfloor \frac{\nu}{c} \right\rfloor - \frac{\beta\nu}{c} > \frac{1}{2} \left( \frac{\nu}{c} - 1 \right) - \frac{\beta\nu}{c} \quad (81)$$

and since, according to equations (70–74), we have

$$\frac{\nu}{c} \geq \frac{\gamma\mu}{1 + \frac{\gamma\xi}{\log(1/\rho)}} = \frac{\mu}{\frac{1}{\gamma} + \frac{\xi}{\log(1/\rho)}} > \frac{1}{(1-2\beta)}, \quad (82)$$

it comes

$$\frac{1}{2} \left( \frac{\nu}{c} - 1 \right) - \frac{\beta\nu}{c} = \frac{(1-2\beta)\nu}{2c} - \frac{1}{2} > 0. \quad (83)$$

It then results from Hoeffding's inequality that

$$\begin{aligned} \mathbb{P}(J_2 \in G_j(\nu)) &= 1 - \mathbb{P} \left( \sum_{k \in I_j} B_k - \frac{n_j}{2} < - \left( \frac{n_j}{2} - \frac{\beta\nu}{c} \right) \right) \\ &\geq 1 - \exp \left( - \left( \frac{1}{2} - \frac{\beta\nu}{cn_j} \right)^2 2n_j \right). \end{aligned} \quad (84)$$

Now,  $\left( \frac{1}{2} - \frac{\beta\nu}{cn_j} \right)^2 2n_j = \frac{n_j}{2} - \frac{2\beta\nu}{c} + \frac{2\beta^2\nu^2}{c^2 n_j} = \frac{\nu}{c} \left( \frac{n_j}{2\frac{\nu}{c}} - 2\beta + \frac{2\beta^2\frac{\nu}{c}}{n_j} \right) \geq \frac{\nu}{c} \left( \zeta \left( \frac{\nu}{c} \right) - 2\beta \right)$ , where the last inequality comes from (76) and the  $\zeta$  function is defined in equation (60). Further it results from condition (82) that<sup>4</sup>  $\lfloor \frac{\nu}{c} \rfloor \geq \frac{4\beta^2}{1-4\beta^2}$ . Therefore  $\zeta \left( \frac{\nu}{c} \right) \geq \frac{\lfloor \frac{\nu}{c} \rfloor}{2(\lfloor \frac{\nu}{c} \rfloor + 1)} + 2\beta^2 = \frac{1}{2} + 2\beta^2 - \frac{1}{2(\lfloor \frac{\nu}{c} \rfloor + 1)}$ , according to Lemma 3.1, and

$$\left( \frac{1}{2} - \frac{\beta\nu}{cn_j} \right)^2 2n_j \geq \frac{\nu(1-2\beta)^2}{2c} - \frac{1}{2} \frac{\frac{\nu}{c}}{\lfloor \frac{\nu}{c} \rfloor + 1} \geq \frac{\nu}{c} \frac{(1-2\beta)^2}{2} - \frac{1}{2}. \quad (85)$$

Hence

$$\mathbb{P}(J_2 \in G_j(\nu)) \geq 1 - \sqrt{e} \exp \left[ \frac{-(1-2\beta)^2\nu}{2c} \right] \quad (86)$$

and we obtain

$$\mathbb{P}(J_2 \notin G(\nu)) \leq \sum_{j=1}^c P(J_2 \notin G_j(\nu)) \leq c\sqrt{e} \exp \left[ \frac{-(1-2\beta)^2\nu}{2c} \right] \leq \psi \left( \frac{\nu}{c} \right) \quad (87)$$

(the last inequality resulting from equations (70) and (69)), that proves (78). Finally, the same proof, where  $B_k$  is replaced with  $(1 - B_k)$  in relations (80) and (84) and  $G_j(\nu)$  is replaced with  $G'_j(\nu)$  leads to (79).  $\diamond$

Now for any memoryless source  $S$  with binary-part to compress and discrete side-information, it results from Proposition 2.6 (since<sup>5</sup>  $\mu > \frac{3}{2\log(1/\rho)}$ ) that there exists  $\mathcal{S}_r \subset \{S_\mu^{(i)} : 0 \leq i < 2^\mu\}$  such that

$$\forall M \in \mathcal{S}_r, Z(M) \leq 2\rho^\mu \quad \text{and} \quad \mathbb{P}(S_\mu^{(J_1)} \in \mathcal{S}_r) \geq 1 - H(S) - 4\rho^{2\mu} - \frac{1}{2\sqrt{2}} \left( \frac{\Lambda}{\rho} \right)^\mu, \quad (88)$$

where  $J_1$  is a random variable uniformly distributed over  $\llbracket 0, 2^\mu - 1 \rrbracket$ . In a same way, it results from Proposition 2.7 (since<sup>6</sup>  $\mu > \frac{3}{2\log(1/\rho)}$ ) that there exists  $\mathcal{S}'_r \subset \{S_\mu^{(i)} : 0 \leq i < 2^\mu\}$  such that

$$\forall M \in \mathcal{S}'_r, Z'(M) \leq 2\rho^\mu \quad \text{and} \quad \mathbb{P}(S_\mu^{(J_1)} \in \mathcal{S}'_r) \geq H(S) - \frac{2}{\ln 2} \rho^{2\mu} - \frac{\sqrt{\ln 2}}{2} \left( \frac{\Lambda}{\rho} \right)^\mu. \quad (89)$$

For any  $M \in \mathcal{S}_r$ , we define the sequence

$$\tilde{Z}_k^{(i)} = \begin{cases} \left( \tilde{Z}_{k-1}^{(\lfloor i/2 \rfloor)} \right)^2 & \text{if } i \text{ is odd,} \\ 2\tilde{Z}_{k-1}^{(\lfloor i/2 \rfloor)} & \text{if } i \text{ is even,} \end{cases} \quad \text{for any } k \in \mathbb{N}^*, \text{ with } \tilde{Z}_0^{(0)} = Z(M). \quad (90)$$

<sup>4</sup>Indeed, the condition (82) implies

$$\left\lfloor \frac{\nu}{c} \right\rfloor \geq \frac{\nu}{c} - 1 > \frac{1}{1-2\beta} - 1 = \frac{2\beta}{1-2\beta} > \left( \frac{2\beta}{1-2\beta} \right) \left( \frac{2\beta}{1+2\beta} \right) = \frac{4\beta^2}{1-4\beta^2}.$$

<sup>5</sup>Indeed, condition (72) implies  $\mu > \frac{(1+\alpha_0)\xi}{(\xi-1)\log(1/\rho)} > \frac{1+\alpha_0}{\log(1/\rho)} \simeq \frac{2.06}{\log(1/\rho)} > \frac{3}{2\log(1/\rho)}$ .

<sup>6</sup>Indeed, condition (72) implies  $\mu > \frac{(1+\alpha_0)\xi}{(\xi-1)\log(1/\rho)} > \frac{1+\alpha_0}{\log(1/\rho)} \simeq \frac{2.06}{\log(1/\rho)} > \frac{2-\log(\sqrt{5}-1)}{\log(1/\rho)} \simeq \frac{1.69}{\log(1/\rho)}$ .

Let us note  $R(\mu) = \{i \in \llbracket 0, 2^\mu - 1 \rrbracket : S_\mu^{(i)} \in \mathcal{S}_r\}$ .

In the same way, for any  $M' \in \mathcal{S}'_r$ , we define the sequence

$$\tilde{Z}'^{(i)}_k = \begin{cases} \left(\tilde{Z}'^{(\lfloor i/2 \rfloor)}_{k-1}\right)^2 & \text{if } i \text{ is even,} \\ 2\tilde{Z}'^{(\lfloor i/2 \rfloor)}_{k-1} & \text{if } i \text{ is odd,} \end{cases} \quad \text{for any } k \in \mathbb{N}^*, \text{ with } \tilde{Z}'^{(0)}_0 = Z'(M'). \quad (91)$$

Let us note  $R'(\mu) = \{i \in \llbracket 0, 2^\mu - 1 \rrbracket : S_\mu^{(i)} \in \mathcal{S}'_r\}$ .

**Lemma 3.6 (Guruswami & Xia)** *With the notations introduced in the previous subsection, we have  $\log \left( \max \left\{ \tilde{Z}'^{(i)}_\nu : i \in G(\nu) \right\} \right) \leq -2^{\beta\nu}$ .*

**Proof.** Let us note for  $j \in \llbracket 1, c \rrbracket$ ,  $\nu_j = \sum_{k=1}^j n_k$  (thus  $\nu_c = \nu$ ) and

$$z_j = \max \left\{ \tilde{Z}'^{(\lfloor i/2^{\nu-\nu_j} \rfloor)}_{\nu_j} : i \in G(\nu) \right\} \quad \text{for any } j \in \llbracket 1, c \rrbracket \quad \text{and } z_0 = Z(M). \quad (92)$$

Let us remark first that if  $z_j$  has been attained by  $p$  squarings ( $0 \leq p \leq n_j$ ) and  $n_j - p$  doublings from  $z_{j-1}$ , the maximum value will be obtained by applying first the  $n_j - p$  doublings followed by the  $p$  squarings<sup>7</sup>. Moreover, if  $z_j < 1$ , the maximum value will be reached by minimizing the number of squarings<sup>8</sup>.

According to relations (72), (74), (70) and (88), we have  $\mu > \frac{(1+\alpha_0)\xi}{(\xi-1)\log(1/\rho)}$ ,  $M \in \mathcal{S}_r$ ,  $\frac{\nu}{c} \leq \frac{\mu \log(1/\rho)}{\xi}$  and

$$\log Z(M) + \frac{\nu}{c} \leq 1 - \mu \log(1/\rho)(1 - 1/\xi) \leq 1 - (1 + \alpha_0) = -\alpha_0 \leq -1. \quad (93)$$

Equation (93) shows that  $\log Z(M) + n_1 \leq \log Z(M) + \frac{\nu}{c} + 1 < 0$ , hence if one doubles  $n_1$  times  $z_0$  one obtains a value that is smaller than 1. Thus  $z_1 < 1$  and since for any  $i \in G(\nu)$ , the number of squarings is worth at least  $\lceil \frac{\beta\nu}{c} \rceil$ , we have

$$\log z_1 \leq 2^{\lceil \frac{\beta\nu}{c} \rceil} \left( \log Z(M) + \frac{\nu}{c} + 1 - \left\lceil \frac{\beta\nu}{c} \right\rceil \right) \leq 2^{\frac{\beta\nu}{c}} \left( \log Z(M) + \frac{(1-\beta)\nu}{c} + 1 \right), \quad (94)$$

which can be written, using the  $\varphi$  function introduced in Lemma 3.3,

$$\log z_1 + \frac{\nu}{c} \varphi\left(\frac{\nu}{c}\right) \leq 2^{\frac{\beta\nu}{c}} \left( \log Z(M) + \frac{\nu}{c} \varphi\left(\frac{\nu}{c}\right) \right) \leq 2^{\frac{\beta\nu}{c}} \left( \log Z(M) + \frac{\nu}{c} \right), \quad (95)$$

according to condition (68) and

$$\frac{\nu}{c} \geq \frac{\gamma\mu}{1 + \frac{\gamma\xi}{\log(1/\rho)}} = \frac{\mu}{\frac{1}{\gamma} + \frac{\xi}{\log(1/\rho)}} > c_\beta \quad (96)$$

– the last inequality resulting from condition (73) and definitions (71–72) of  $c_\delta$ .

Moreover, according to Lemma 3.3, the  $\varphi$  function is greater than  $1 - \beta$  and it results from (93) and (95) that

$$\log z_1 + \frac{\nu}{c} < -\alpha_0 2^{\frac{\beta\nu}{c}} + \frac{\beta\nu}{c} = \zeta\left(\frac{\beta\nu}{c}\right) \leq -1, \quad (97)$$

where the  $\zeta$  function is defined in Lemma 3.2. So  $\frac{\nu}{c} + 1 + \log z_1 < 0$ , therefore  $z_2 < 1$  and the same reasoning as above leads to

$$\log z_2 \leq 2^{\frac{\beta\nu}{c}} \left( \log z_1 + n_2 - \left\lceil \frac{\beta\nu}{c} \right\rceil \right) < 2^{\frac{\beta\nu}{c}} \left( \log z_1 + \frac{(1-\beta)\nu}{c} + 1 \right), \quad (98)$$

<sup>7</sup>Indeed, starting from  $x$ , if we apply  $p$  squarings and  $n_j - p$  doublings, the final result will be of the form  $x^{2^p} 2^\alpha$ , and  $\alpha$ , the power of 2, will be maximum if the  $n_j - p$  doublings precede the  $p$  squarings.

<sup>8</sup>If  $z_j > 1$ , the maximum value can be reached by replacing some doublings by squarings: starting from  $x > 0$ ,  $p + 1$  squarings will give a greater result than  $p$  squarings if and only if

$$2^p(\log x + n_j - p) \leq 2^{p+1}(\log x + n_j - p - 1) \quad \Leftrightarrow \quad \log x \geq 2 - (n_j - p).$$

which can be written

$$\log z_2 + \frac{\nu}{c} \varphi\left(\frac{\nu}{c}\right) \leq 2^{\frac{\beta\nu}{c}} \left( \log z_1 + \frac{\nu}{c} \varphi\left(\frac{\nu}{c}\right) \right), \quad (99)$$

which, with (95), leads to

$$\log z_2 + (1 - \beta) \frac{\nu}{c} \leq \log z_2 + \frac{\nu}{c} \varphi\left(\frac{\nu}{c}\right) \leq 2^{\frac{2\beta\nu}{c}} \left( \log z_0 + \frac{\nu}{c} \varphi\left(\frac{\nu}{c}\right) \right) \quad (100)$$

and according to conditions (93) and (96) and the property (68), it follows that

$$\begin{aligned} \log z_2 + \frac{\nu}{c} &\leq 2^{\frac{2\beta\nu}{c}} \left( \log z_0 + \frac{\nu}{c} \right) + \frac{\beta\nu}{c} \\ &< -\alpha_0 2^{\frac{2\beta\nu}{c}} + \frac{\beta\nu}{c} = \zeta \left( \frac{2\beta\nu}{c} \right) - \frac{\beta\nu}{c} \leq \zeta \left( \frac{2\beta\nu}{c} \right) \leq -1, \end{aligned} \quad (101)$$

where the last inequality results from Lemma 3.2. More generally, let us suppose that

$$\log z_{j-1} + \frac{\nu}{c} \leq 2^{\frac{(j-1)\beta\nu}{c}} \left( \log z_0 + \frac{\nu}{c} \right) + \frac{\beta\nu}{c}, \quad (102)$$

so  $1 + \frac{\nu}{c} + \log z_{j-1} < 1 + \zeta \left( \frac{(j-1)\beta\nu}{c} \right) \leq 0$  according to (93) and Lemma 3.2, and the same reasoning as above gives

$$\log z_j + \frac{(1 - \beta)\nu}{c} \leq 2^{\frac{j\beta\nu}{c}} \left( \log z_0 + \frac{\nu}{c} \right), \quad (103)$$

in particular for  $j = c$  :

$$\log z_c \leq 2^{\beta\nu} \left( \log z_0 + \frac{\nu}{c} \right) \leq -2^{\beta\nu}, \quad (104)$$

where the last inequality results from relation (93).  $\diamond$

The same reasoning replacing  $\tilde{Z}_k^{(i)}$  with  $\tilde{Z}'_k^{(i)}$  leads to the following lemma.

**Lemma 3.7** *With the notations introduced in the previous subsection, we have*

$$\log \left( \max \left\{ \tilde{Z}'_\nu^{(i)} : i \in G'(\nu) \right\} \right) \leq -2^{\beta\nu}.$$

After all, we can deduce from equations (103–104) that

$$\log z_c + \frac{(1 - \beta)\nu}{c} \leq -2^{\beta\nu}. \quad (105)$$

Further, since  $\log(1/\ln 2) \simeq 0.529$  and  $\beta > 0$ , we have

$$\beta(2\log(1/\ln 2) - 1) > 0 > \log(1/\ln 2) - 1, \quad \text{i.e.,} \quad \frac{1}{1 - 2\beta} > \frac{\log(1/\ln 2)}{1 - \beta}, \quad (106)$$

which implies, according to the conditions (71,73) and the equation (70),

$$\mu > \left( \frac{\xi}{\log(1/\rho)} + \frac{1}{\gamma} \right) \frac{1}{1 - 2\beta} > \frac{c \log(1/\ln 2)}{\gamma(1 - \beta)}, \quad (107)$$

i.e.,  $\frac{(1-\beta)\nu}{c} > \log(1/\ln 2)$ . Thus the relation (105) leads to the following lemma.

**Lemma 3.8** *With the notations introduced in the previous subsection, we have*

$$\log \left( \max \left\{ \tilde{Z}_\nu^{(i)} : i \in G(\nu) \right\} \right) \leq -2^{\beta\nu} + \log(\ln 2). \quad (108)$$

Let us recall that  $\nu_0 = \nu + \mu$  and let us summarize the results proved in this section. We expanded  $i \in \llbracket 0, 2^{\nu_0} - 1 \rrbracket$  into  $i = i_1 + 2^\mu i_2$ , where the binary digits of  $i_2 \in \llbracket 0, 2^\nu - 1 \rrbracket$  and  $i_1 \in \llbracket 0, 2^\mu - 1 \rrbracket$  correspond respectively to the first  $\nu$  and last  $\mu$  bits of  $i$ . We proved that if  $i_1 \in R(\mu)$  (i.e., if  $S_\mu^{(i_1)} \in \mathcal{S}_r$  or equivalently if  $Z(S_\mu^{(i_1)}) < 2\rho^\mu$ ) and if  $i_2 \in G(\nu)$ , then

$$Z(S_{\nu_0}^{(i)}) \leq 2^{-2^{\beta\nu}} \ln 2 = 2^{-2^{\delta\nu_0}} \ln 2. \quad (109)$$

We also proved that if  $i_1 \in R'(\mu)$  (i.e., if  $S_\mu^{(i_1)} \in \mathcal{S}'_r$  or equivalently if  $Z'(S_\mu^{(i_1)}) < 2\rho^\mu$ ) and if  $i_2 \in G'(\nu)$ , then

$$Z'(S_{\nu_0}^{(i)}) \leq 2^{-2^{\beta\nu}} = 2^{-2^{\delta\nu_0}}. \quad (110)$$

Now, according to equations (88) and (78) and assuming  $J = J_1 + 2^\mu J_2$  is a random variable uniformly distributed over  $\llbracket 0, 2^{\nu_0} - 1 \rrbracket$ , we have

$$\begin{aligned} \mathbb{P}(J_1 \in R(\mu) \text{ and } J_2 \in G(\nu)) &= \mathbb{P}(J_1 \in R(\mu)) \mathbb{P}(J_2 \in G(\nu)) \\ &\geq \left(1 - H(S) - 4\rho^{2\mu} - \frac{1}{2\sqrt{2}} \left(\frac{\Lambda}{\rho}\right)^\mu\right) \left(1 - \psi\left(\frac{\nu}{c}\right)\right) \\ &\geq 1 - H(S) - 4\rho^{2\mu} - \frac{1}{2\sqrt{2}} \left(\frac{\Lambda}{\rho}\right)^\mu - \psi\left(\frac{\nu}{c}\right). \end{aligned} \quad (111)$$

We deduce that

$$\begin{aligned} \mathbb{P}\left(Z(S_{\nu_0}^{(J)}) \leq 2^{-2^{\delta\nu_0}} \ln 2\right) &\geq \mathbb{P}(J_1 \in R(\mu) \text{ and } J_2 \in G(\nu)) \\ &\geq 1 - H(S) - 4\rho^{2\mu} - \frac{1}{2\sqrt{2}} \left(\frac{\Lambda}{\rho}\right)^\mu - \psi\left(\frac{\nu}{c}\right). \end{aligned} \quad (112)$$

In a same way, we have

$$\begin{aligned} \mathbb{P}\left(Z'(S_{\nu_0}^{(J)}) \leq 2^{-2^{\delta\nu_0}}\right) &\geq \mathbb{P}(J_1 \in R'(\mu) \text{ and } J_2 \in G'(\nu)) \\ &\geq H(S) - \frac{2}{\ln 2} \rho^{2\mu} - \frac{\sqrt{\ln 2}}{2} \left(\frac{\Lambda}{\rho}\right)^\mu - \psi\left(\frac{\nu}{c}\right). \end{aligned} \quad (113)$$

Thus, we proved that for any  $\mu$  multiple of  $\gamma_d$ :  $\mu = k\gamma_d$  with  $k \in \mathbb{N}^*$  great enough ( $k > \frac{c\delta}{\gamma_d}$ ) or in other words for any sufficiently large  $\nu_0 = \mu(1 + \gamma) = k(\gamma_d + \gamma_n)$ , the relations (109–110) and (112–113) are valid.

Let us consider now  $\nu'_0$  between two successive multiples of  $\gamma_d + \gamma_n$ :

$$\nu'_0 = k(\gamma_d + \gamma_n) + u = \mu(1 + \gamma') \quad (114)$$

with

$$\mu = k\gamma_d, \quad 0 \leq u < \gamma_n + \gamma_d \quad \text{and} \quad \gamma' = \frac{k\gamma_n + u}{k\gamma_d} = \gamma + \frac{u}{k\gamma_d}, \quad (115)$$

then

$$\gamma \leq \gamma' = \gamma + \frac{u}{k\gamma_d} \leq \gamma + \frac{u}{\gamma_d} < 1 + 2\gamma. \quad (116)$$

Let us remark that if we introduce  $\delta'$  such that

$$\gamma' = \frac{\delta'}{\beta - \delta'} \geq \gamma = \frac{\delta}{\beta - \delta}, \quad (117)$$

then  $\delta \leq \delta'$  and  $2^{-2^{\delta'\nu'_0}} \leq 2^{-2^{\delta\nu'_0}}$ . Thus, by replacing  $\gamma$  with  $1 + 2\gamma$  in the definition of  $\psi$  (see (69)), leaving  $\gamma$  unchanged in equation (71) and replacing  $\gamma$  with  $\gamma'$  everywhere else, the above reasoning can be remade in order to prove the following proposition.

**Proposition 3.9** For any  $\delta \in ]0, \frac{1}{2}[$ , for any  $\beta \in ]\delta, \frac{1}{2}[$ , for any  $\rho \in ]0, 1[$ , for any  $\xi > 1$ , there exists  $C_{\delta,\beta} > 0$  and  $A_{\delta,\beta} > 0$  such that for any memoryless source  $S$  with binary-part to compress and discrete side-information and for any integer  $\nu_0 > C_{\delta,\beta}$ , we have

$$\mathbb{P}\left(Z(S_{\nu_0}^{(J)}) \leq 2^{-2^{\delta\nu_0}} \ln 2\right) \geq 1 - H(S) - 4\rho^{2\mu} - \frac{1}{2\sqrt{2}} \left(\frac{\Lambda}{\rho}\right)^\mu - A_{\delta,\beta} \exp\left(\frac{-(1-2\beta)^2\nu}{2c}\right) \quad (118)$$

$$\mathbb{P}\left(Z'(S_{\nu_0}^{(J)}) \leq 2^{-2^{\delta\nu_0}}\right) \geq H(S) - \frac{2}{\ln 2} \rho^{2\mu} - \frac{\sqrt{2}}{2} \left(\frac{\Lambda}{\rho}\right)^\mu - A_{\delta,\beta} \exp\left(\frac{-(1-2\beta)^2\nu}{2c}\right), \quad (119)$$

where  $J$  is a random variable uniformly distributed over  $\llbracket 0, 2^{\nu_0} - 1 \rrbracket$ ,  $\gamma = \frac{\delta}{\beta - \delta}$ ,  $\nu_0 = (\gamma + 1)\mu$ ,  $\nu = \gamma\mu$  and  $c = \left\lceil \frac{\gamma\xi}{\log(1/\rho)} \right\rceil$ .

Let us denote

$$\varepsilon = \frac{\mu}{\nu_0} = \frac{1}{\gamma + 1} = \frac{\beta - \delta}{\beta}, \quad \text{hence} \quad \beta = \frac{\delta}{1 - \varepsilon} \quad \text{and} \quad \gamma = \frac{1}{\varepsilon} - 1. \quad (120)$$

Now we can choose  $\xi > 1$  so that the fraction  $\frac{\gamma\xi}{\log(1/\rho)}$  is an integer (equal to  $c$ ), then we have

$$\frac{\nu}{c} = \frac{\gamma\mu}{c} = \frac{\mu \log(1/\rho)}{\xi} \quad (121)$$

and the previous proposition becomes:

**Proposition 3.10** For any  $\delta \in ]0, \frac{1}{2}[$ , for any  $\rho \in ]0, 1[$ , for any  $\varepsilon \in ]0, 1 - 2\delta[$ , for any  $\xi > 1$  such that  $\frac{(1-\varepsilon)\xi}{\varepsilon \log(1/\rho)} \in \mathbb{N}^*$ , there exists  $C_{\delta,\varepsilon} > 0$  and  $A_{\delta,\varepsilon} > 0$  such that for any memoryless source  $S$  with binary-part to compress and discrete side-information and for any integer  $\nu_0 > C_{\delta,\varepsilon}$ , we have

$$\begin{aligned} \mathbb{P}\left(Z(S_{\nu_0}^{(J)}) \leq 2^{-2^{\delta\nu_0}} \ln 2\right) &\geq 1 - H(S) - 4\rho^{2\varepsilon\nu_0} - \frac{1}{2\sqrt{2}} \left(\frac{\Lambda}{\rho}\right)^{\varepsilon\nu_0} \\ &\quad - A_{\delta,\varepsilon} \exp\left(\frac{-(1 - \frac{2\delta}{1-\varepsilon})^2 \log(1/\rho) \varepsilon \nu_0}{2\xi}\right) \\ &= 1 - H(S) - 4\rho^{2\varepsilon\nu_0} - \frac{1}{2\sqrt{2}} \left(\frac{\Lambda}{\rho}\right)^{\varepsilon\nu_0} - A_{\delta,\varepsilon} \left[ (\rho)^{\left(1 - \frac{2\delta}{1-\varepsilon}\right)^2 \frac{1}{2\xi \ln 2}} \right]^{\varepsilon\nu_0} \end{aligned} \quad (122)$$

$$\mathbb{P}\left(Z'(S_{\nu_0}^{(J)}) \leq 2^{-2^{\delta\nu_0}}\right) \geq H(S) - \frac{2}{\ln 2} \rho^{2\varepsilon\nu_0} - \frac{\sqrt{\ln 2}}{2} \left(\frac{\Lambda}{\rho}\right)^{\varepsilon\nu_0} - A_{\delta,\varepsilon} \left[ (\rho)^{\left(1 - \frac{2\delta}{1-\varepsilon}\right)^2 \frac{1}{2\xi \ln 2}} \right]^{\varepsilon\nu_0}, \quad (123)$$

where  $J$  is a random variable uniformly distributed over  $\llbracket 0, 2^{\nu_0} - 1 \rrbracket$ . Moreover we can choose

$$A_{\delta,\varepsilon} = \sqrt{e} \left(1 + \frac{(2 - \varepsilon)\xi}{\varepsilon \log(1/\rho)}\right). \quad (124)$$

Let us put  $n = 2^{\nu_0}$ . Equation (122) can be written

$$\mathbb{P}\left(Z(S_{\nu_0}^{(J)}) \leq 2^{-n^\delta} \ln 2\right) \geq 1 - H(S) - \frac{4}{n^{\kappa_\varepsilon^{(1)}}} - \frac{1}{2\sqrt{2} \cdot n^{\kappa_\varepsilon^{(2)}}} - \frac{A_{\delta,\varepsilon}}{n^{\kappa_\varepsilon^{(3)}}} \quad (125)$$

with

$$\kappa_\varepsilon^{(1)} = 2\varepsilon \log(1/\rho), \quad (126)$$

$$\kappa_\varepsilon^{(2)} = \varepsilon \log(\rho/\Lambda) \quad (127)$$

$$\kappa_\varepsilon^{(3)} = \varepsilon \left(1 - \frac{2\delta}{1 - \varepsilon}\right)^2 \frac{\log(1/\rho)}{2\xi \ln 2}. \quad (128)$$

In order to shorten the notations, let us put

$$\alpha = \alpha(\delta, \varepsilon, \rho, \xi) = \left(1 - \frac{2\delta}{1 - \varepsilon}\right)^2 \frac{1}{2\xi \ln 2}. \quad (129)$$

For fixed  $\delta \in ]0, \frac{1}{2}[$ , we look for  $\varepsilon \in ]0, 1 - 2\delta[$ ,  $\rho \in ]0, 1[$  and  $\xi > 1$  that maximize  $\kappa_\varepsilon = \min(\kappa_\varepsilon^{(1)}, \kappa_\varepsilon^{(2)}, \kappa_\varepsilon^{(3)})$ . Let us remark that

$$\kappa_\varepsilon^{(3)} = \varepsilon \left(1 - \frac{2\delta}{1 - \varepsilon}\right)^2 \frac{\log(1/\rho)}{2\xi \ln 2} < \frac{\varepsilon \log(1/\rho)}{2 \ln 2} < 2\varepsilon \log(1/\rho) = \kappa_\varepsilon^{(1)}, \quad (130)$$

therefore  $\min(\kappa_\varepsilon^{(1)}, \kappa_\varepsilon^{(2)}, \kappa_\varepsilon^{(3)}) = \min(\kappa_\varepsilon^{(2)}, \kappa_\varepsilon^{(3)})$ . Moreover, we have

$$\kappa_\varepsilon^{(2)} \leq \kappa_\varepsilon^{(3)} \Leftrightarrow \log(\rho/\Lambda) \leq \alpha \log(1/\rho) \Leftrightarrow \log \rho \leq \frac{\log \Lambda}{1 + \alpha} \Leftrightarrow \rho \leq \Lambda^{\frac{1}{1 + \alpha}}. \quad (131)$$

Firstly, let us suppose that

$$\rho \leq \Lambda^{\frac{1}{1 + \alpha}}. \quad (132)$$

In this case we have  $\min(\kappa_\varepsilon^{(1)}, \kappa_\varepsilon^{(2)}, \kappa_\varepsilon^{(3)}) = \kappa_\varepsilon^{(2)} = \varepsilon \log(\rho/\Lambda)$  and this expression is maximum when the independent variables  $\rho$  and  $\varepsilon$  are maximum, hence for  $\rho = \Lambda^{\frac{1}{1 + \alpha}}$ , which leads to

$$\min(\kappa_\varepsilon^{(1)}, \kappa_\varepsilon^{(2)}, \kappa_\varepsilon^{(3)}) = \kappa_\varepsilon^{(2)} = \kappa_\varepsilon^{(3)} = \log(1/\Lambda) \frac{\varepsilon \alpha}{1 + \alpha} \quad \text{with} \quad \alpha = \alpha(\varepsilon, \xi), \quad (133)$$

since  $\delta$  is supposed to be fixed. Secondly, if we suppose that

$$\rho \geq \Lambda^{\frac{1}{1 + \alpha}}, \quad (134)$$

then  $\min(\kappa_\varepsilon^{(1)}, \kappa_\varepsilon^{(2)}, \kappa_\varepsilon^{(3)}) = \kappa_\varepsilon^{(3)} = \varepsilon \alpha \log(1/\rho)$  and this quantity is maximum when  $\alpha$  is maximum and  $\rho$  minimum, i.e., when inequality (134) is an equality, i.e., when (133) is satisfied.

Further, the exponent  $\kappa_\varepsilon^{(2)} = \kappa_\varepsilon^{(3)}$  in equation (133) is maximum if and only if

$$g(\varepsilon, \xi) \stackrel{\text{def}}{=} \frac{\varepsilon \alpha(\varepsilon, \xi)}{1 + \alpha(\varepsilon, \xi)} \quad (135)$$

is maximum. Since

$$\frac{\partial g}{\partial \xi}(\varepsilon, \xi) = \frac{\varepsilon}{(1 + \alpha)^2} \cdot \frac{\partial \alpha}{\partial \xi}(\varepsilon, \xi) = \frac{-\varepsilon \left(1 - \frac{2\delta}{1 - \varepsilon}\right)^2}{(1 + \alpha)^2 2\xi^2 \ln 2} < 0, \quad (136)$$

$g(\varepsilon, \xi)$  is maximum when

$$\xi = \xi_{\min} > 1 \quad (137)$$

and equation (129) implies that

$$\alpha(\varepsilon, \xi_{\min}) = \frac{\left(1 - \frac{2\delta}{1 - \varepsilon}\right)^2}{2\xi_{\min} \ln 2} \stackrel{\text{def}}{=} \alpha_{\max}(\varepsilon). \quad (138)$$

Finally, the function to maximize is

$$\tilde{g}(\varepsilon) \stackrel{\text{def}}{=} \frac{\varepsilon \alpha_{\max}(\varepsilon)}{1 + \alpha_{\max}(\varepsilon)} \quad (139)$$

whose derivative

$$\tilde{g}'(\varepsilon) = \frac{\alpha_{\max}(\varepsilon)}{1 + \alpha_{\max}(\varepsilon)} + \frac{\varepsilon \alpha'_{\max}(\varepsilon)}{(1 + \alpha_{\max}(\varepsilon))^2} \quad (140)$$

vanishes if and only if  $\alpha_{\max}(\varepsilon)(1 + \alpha_{\max}(\varepsilon)) + \varepsilon\alpha'_{\max}(\varepsilon) = 0$ . We obtain a trivial solution  $\varepsilon = 1 - 2\delta$  (corresponding to a minimum:  $\tilde{g}(1 - 2\delta) = 0$ ) and a third degree algebraic equation in  $u$ , with  $u = 1 - \varepsilon$ :

$$P(u) = Au^3 - Bu^2 - Cu - D, \quad \text{with} \quad \begin{cases} A = 2\xi_{\min} \ln 2 + 1 \\ B = 2\delta(3 - 2\xi_{\min} \ln 2) \\ C = 4\delta(2\xi_{\min} \ln 2 - 3\delta) \\ D = 8\delta^3 \end{cases} \quad (141)$$

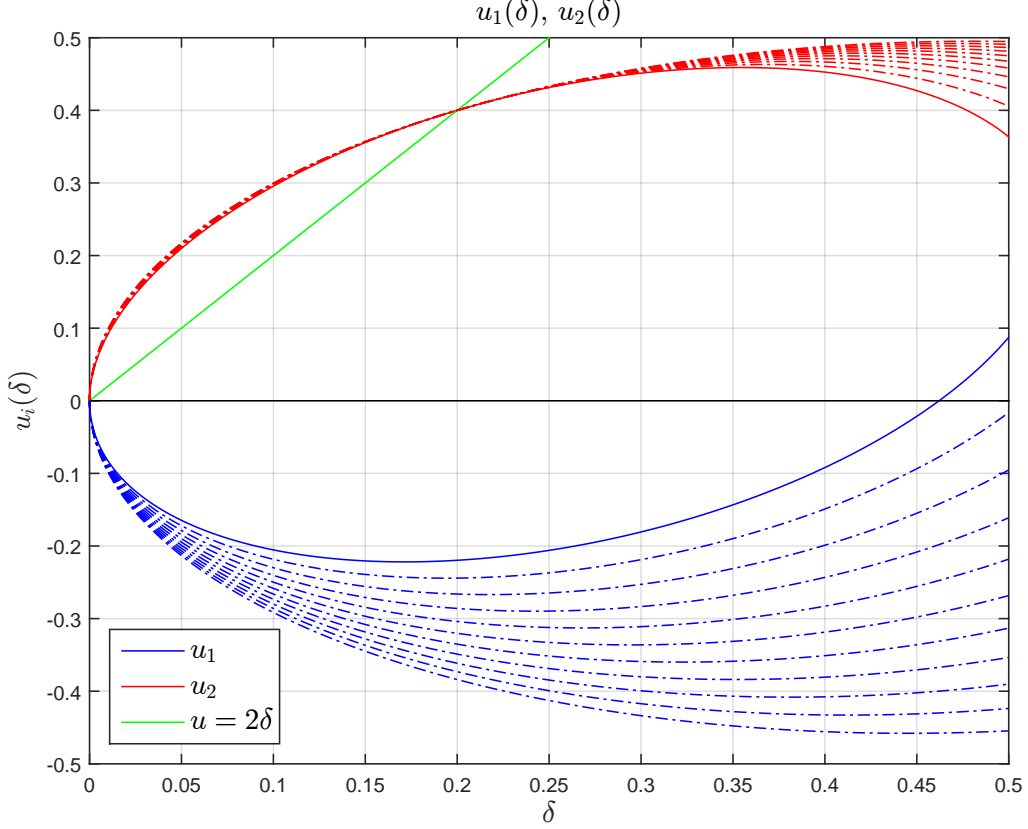

Figure 1: Graphs of  $u_1(\delta)$  and  $u_2(\delta)$ , the roots of  $P'(u)$ , for  $\delta \in ]0, \frac{1}{2}[$  and various values of  $\xi_{\min} = (10 + k)/10$  ( $0 \leq k \leq 10$ ); solid line corresponds to  $\xi_{\min} = 1$ .

The discriminant of  $P$  is the resultant  $\text{Res}(P, P')$  between polynomials  $P(u)$  and its derivative  $P'(u) = 3Au^2 - 2Bu - C$ :

$$\text{Res}(P, P') = \begin{vmatrix} A & -B & -C & -D & 0 \\ 0 & A & -B & -C & -D \\ 0 & 0 & 3A & -2B & -C \\ 0 & 3A & -2B & -C & 0 \\ 3A & -2B & -C & 0 & 0 \end{vmatrix} \quad (142)$$

$$= 256(\xi_{\min} \ln 2)^2(2\xi_{\min} \ln 2 + 1)(4\delta^2 - 4\delta + 2\xi_{\min} \ln 2 + 1)\delta^3 \\ \times (8\xi_{\min} \ln 2 - \delta(27 - 2\xi_{\min} \ln 2)). \quad (143)$$

The third degree equation  $P(u) = 0$  admits a multiple root if and only if the resultant  $\text{Res}(P, P')$  vanishes, i.e., if and only if  $\delta = 0$  or (see Figure 2)

$$\delta = \delta_1(\xi_{\min}) = \frac{8\xi_{\min} \ln 2}{27 - 2\xi_{\min} \ln 2} \underset{\xi_{\min}=1}{\simeq} 0.21649. \quad (144)$$



Thus for all  $\delta \in ]0, \delta_1(\xi_{\min})[$ , the equation  $P(u) = 0$  admits three real roots, for  $\delta > \delta_1(\xi_{\min})$  the same equation admits only one real root and for  $\delta = \delta_1(\xi_{\min})$ , the real root is multiple. Moreover, let us introduce the discriminant of  $P'(u)$ :

$$\Delta' = B^2 + 3AC = 8\delta\xi_{\min} \ln 2 (6\xi_{\min} \ln 2 + 3 - \delta(15 - 2\xi_{\min} \ln 2)), \quad (145)$$

which vanishes when

$$\delta = \delta_0(\xi_{\min}) = \frac{6\xi_{\min} \ln 2 + 3}{15 - 2\xi_{\min} \ln 2} \underset{\xi_{\min}=1}{\simeq} 0.52586, \quad (146)$$

and, for  $\delta \in ]0, \frac{1}{2}[$ , let

$$u_1(\delta) = \frac{B - \sqrt{\Delta'}}{3A} < 0 \quad \text{and} \quad u_2(\delta) = \frac{B + \sqrt{\Delta'}}{3A} > 0 \quad (147)$$

be the real roots of  $P'(u)$  (see Figure 1). We have  $P(u_1(\delta_1(\xi_{\min}))) = 0$  and  $u_2(\delta_2) = 2\delta_2$  with  $\delta_2 = 1/5 = 0.2$ .

We show on Figure 2 the graphs of the values of  $P(u)$  when  $P'(u)$  vanishes as functions of  $\delta$  for different values of  $\xi_{\min}$  and we can see that for all  $\delta \in ]0, \delta_1(\xi_{\min})[$ ,  $P(u_1) > 0$ . Further,

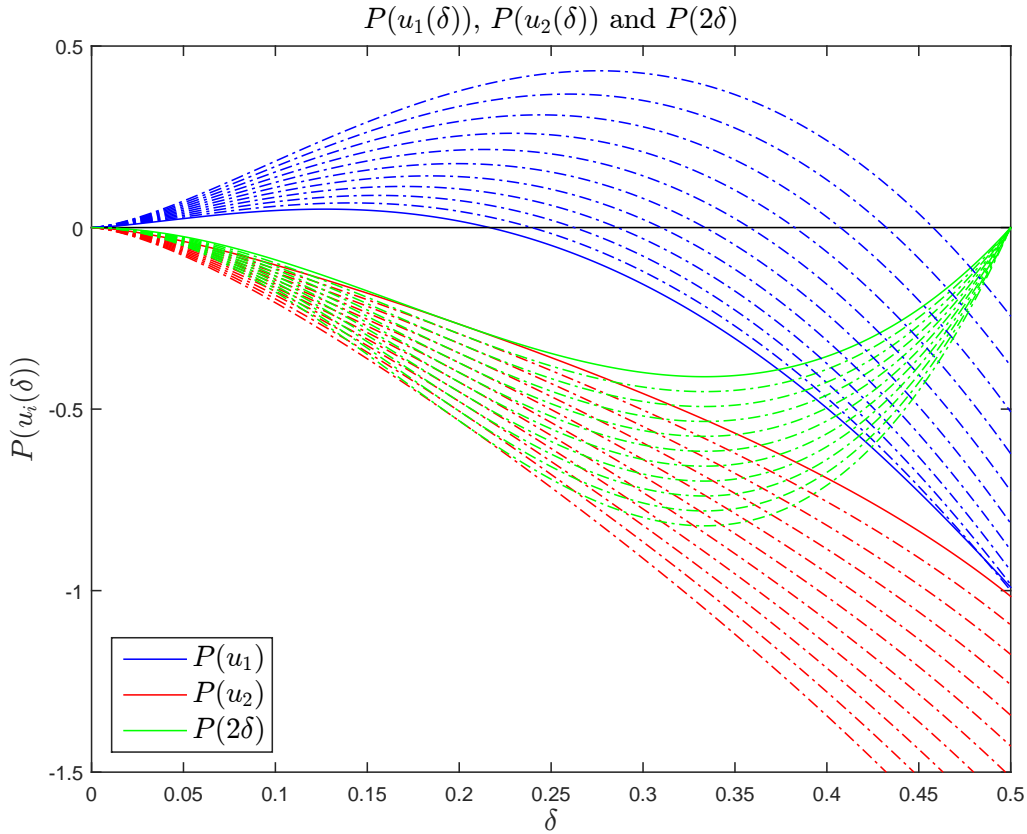

Figure 2: *Graphs of  $P(u_1(\delta))$ ,  $P(u_2(\delta))$  and  $P(2\delta)$  for  $\delta \in ]0, \frac{1}{2}[$  and various values of  $\xi_{\min} = (10 + k)/10$  ( $0 \leq k \leq 10$ ); solid line corresponds to  $\xi_{\min} = 1$ .*

since  $P(0) = -D < 0$  ( $\forall \delta > 0$ ) and  $P(u) \rightarrow -\infty$  when  $u \rightarrow -\infty$  ( $\forall \delta$ ), we deduce that when equation  $P(u) = 0$  admits three real zeros (i.e., when  $0 < \delta < \delta_1(\xi_{\min})$ ), two of the three roots are smaller than zero.

Finally, since polynomial  $4\delta^2 - 4\delta + 2\xi_{\min} \ln 2 + 1$  has no real roots, we can remark that

$$P(1) = A - B - C - D = (1 - 2\delta)(4\delta^2 - 4\delta + 2\xi_{\min} \ln 2 + 1) > 0 \quad \text{for all } \delta \in \left]0, \frac{1}{2}\right[ \quad (148)$$

$$P(2\delta) = 8A\delta^3 - 4B\delta^2 - 2C\delta - D = -16\xi_{\min}(\ln 2)\delta^2(1 - 2\delta) < 0 \quad \text{for all } \delta \in \left]0, \frac{1}{2}\right[ \quad (149)$$

Therefore, for all  $\delta \in ]0, \frac{1}{2}[$ , there is always one and only one zero of  $P(u)$  with  $2\delta < u < 1$ . Let us note  $\nu_1(\delta)$  this root of  $P$ . All the above mentioned conditions on the real roots  $\nu_i(\delta)$  ( $1 \leq i \leq 3$ ) of  $P(u)$  can be observed on Figure 3, which has been obtained with numerical simulations.

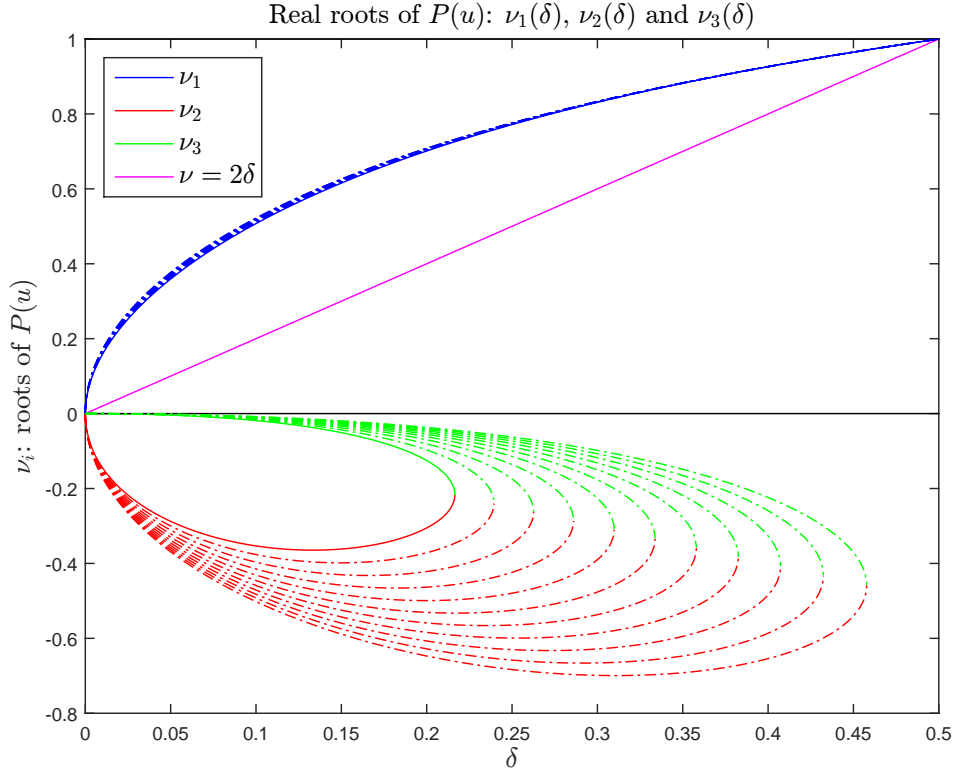

Figure 3: Graphs of  $\nu_1(\delta)$ ,  $\nu_2(\delta)$ ,  $\nu_3(\delta)$  the real roots of  $P(u)$  and of  $\nu = 2\delta$  for  $\delta \in ]0, \frac{1}{2}[$  and various values of  $\xi_{\min} = (10+k)/10$  ( $0 \leq k \leq 10$ ); solid line corresponds to  $\xi_{\min} = 1$ .

We show on Figure 4 (a) the graph of  $\tilde{g}(1 - \nu_1(\delta))$  as a function of  $\delta$  and (b) the graph of  $\tilde{g}(\varepsilon)$  as a function of  $\varepsilon$  for various  $\delta$ . We see that  $\tilde{g}$  is maximum for  $\lim_{\delta \rightarrow 0^+} \tilde{g}(1 - \nu_1(\delta)) \underset{\xi_{\min}=1}{\simeq} 0.0046789995$ .

Thus, we prove the following Proposition.

**Proposition 3.11** *For any  $\delta \in ]0, \frac{1}{2}[$  and for any  $\varepsilon \in ]0, 1 - 2\delta[$ , there exists  $\kappa_{\delta,\varepsilon} > 0$ ,  $A_{\delta,\varepsilon} > 0$  and  $C_{\delta,\varepsilon}$  such that for any memoryless source  $S$  with binary-part to compress and discrete side-information and for any integer  $\nu_0 > C_{\delta,\varepsilon}$  - noting  $n = 2^{\nu_0}$  -, we have*

$$\mathbb{P}\left(Z(S_{\nu_0}^{(J)}) \leq 2^{-n^\delta} \ln 2\right) \geq 1 - H(S) - \frac{A_{\delta,\varepsilon}}{n^{\varepsilon \kappa_{\delta,\varepsilon}}} \quad (150)$$

$$\mathbb{P}\left(Z'(S_{\nu_0}^{(J)}) \leq 2^{-n^\delta}\right) \geq H(S) - \frac{A_{\delta,\varepsilon}}{n^{\varepsilon \kappa_{\delta,\varepsilon}}}, \quad (151)$$

where  $J$  is a random variable uniformly distributed over  $[0, n-1]$ .

Moreover putting  $B_{\delta,\varepsilon} = \left\lceil \frac{(1 - \frac{2\delta}{1-\varepsilon})^2 + 2 \ln 2}{2 \ln(1/\Lambda)} \right\rceil$ , we can choose  $A_{\delta,\varepsilon}$  such that

$$\sqrt{e} \left(1 + \frac{2-\varepsilon}{\varepsilon} B_{\delta,\varepsilon}\right) + \frac{\sqrt{\ln 2}}{2} < A_{\delta,\varepsilon} < \sqrt{e} \left(1 + \frac{2-\varepsilon}{\varepsilon} B_{\delta,\varepsilon}\right) + \frac{\sqrt{\ln 2}}{2} + \frac{2}{\ln 2}. \quad (152)$$

Further, for any  $\delta \in ]0, \frac{1}{2}[$ , for any memoryless source  $S$  with binary-part to compress and discrete side-information, for any  $\nu_0 \in \mathbb{N}$ , let us apply inequality (42) of Proposition 2.5 with

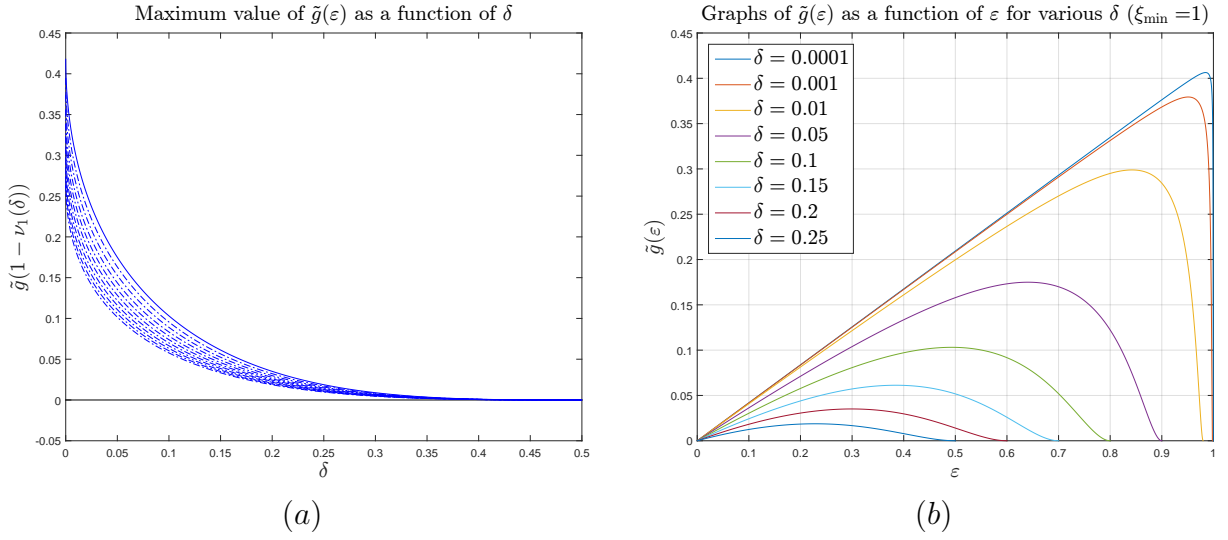

Figure 4: Graphs of (a)  $\tilde{g}(1 - \nu_1(\delta))$  as a function of  $\delta$  and various values of  $\xi_{\min} = (10 + k)/10$  ( $0 \leq k \leq 10$ ) (solid line corresponds to  $\xi_{\min} = 1$ ) and (b) of  $\tilde{g}(\varepsilon)$  as a function of  $\varepsilon$  for various  $\delta$  and  $\xi_{\min} = 1$ .

$\mu = \nu_0$ ,  $m = n = 2^{\nu_0}$  and  $\theta = 2^{-n^\delta}$  (provided that  $\theta \leq \frac{1}{2}$ ):

$$\frac{|\mathcal{H}_{X|Y}(2^{-n^\delta}) \cap \mathcal{V}_{X|Y}^c(2^{-n^\delta})|}{n} \leq \frac{\sqrt{2}\Lambda^{\nu_0}}{2\sqrt{2^{-n^\delta}}}. \quad (153)$$

We claim that for any  $\kappa > 0$ , for any  $\varepsilon > 0$ , there exists  $\theta_{\kappa, \varepsilon} > 0$  such that for all  $n > \theta_{\kappa, \varepsilon}$

$$\frac{\sqrt{2}\Lambda^{\nu_0}}{2\sqrt{2^{-n^\delta}}} \leq \frac{\theta_{\kappa, \varepsilon}}{n^{\kappa\varepsilon}}. \quad (154)$$

Indeed, inequality (154) is equivalent to

$$\log n (\log \Lambda + \kappa\varepsilon) \leq \log \theta_{\kappa, \varepsilon} + \frac{1}{2} (1 + n^\delta), \quad (155)$$

which is satisfied when  $\theta_{\kappa, \varepsilon}$  and  $n$  are sufficiently large.

Finally we have

$$\mathbb{P} \left( H(S_{\nu_0}^{(J)}) > 2^{-n^\delta} \right) = 1 - \mathbb{P} \left( H(S_{\nu_0}^{(J)}) \leq 2^{-n^\delta} \right) \quad (156)$$

and since according to relation (12),

$$Z(S_{\nu_0}^{(J)}) \leq 2^{-n^\delta} \ln 2 \quad \Rightarrow \quad H(S_{\nu_0}^{(J)}) \leq \log(1 + Z(S_{\nu_0}^{(J)})) \leq \frac{Z(S_{\nu_0}^{(J)})}{\ln 2} \leq 2^{-n^\delta}, \quad (157)$$

then

$$\mathbb{P} \left( H(S_{\nu_0}^{(J)}) \leq 2^{-n^\delta} \right) \geq \mathbb{P} \left( Z(S_{\nu_0}^{(J)}) \leq 2^{-n^\delta} \ln 2 \right) \quad (158)$$

and with the notations of Proposition 3.11, we have

$$\mathbb{P} \left( H(S_{\nu_0}^{(J)}) > 2^{-n^\delta} \right) \leq H(S) + \frac{A_{\delta, \varepsilon}}{n^{\varepsilon\kappa_{\delta, \varepsilon}}} \quad (159)$$

Similarly

$$Z'(S_{\nu_0}^{(J)}) \leq 2^{-n^\delta} \quad \Rightarrow \quad H(S_{\nu_0}^{(J)}) \geq 1 - 2^{-n^\delta} \quad (160)$$

implies

$$\mathbb{P} \left( H(S_{\nu_0}^{(J)}) > 1 - 2^{-n^\delta} \right) \geq \mathbb{P} \left( Z'(S_{\nu_0}^{(J)}) \leq 2^{-n^\delta} \right) \geq H(S) - \frac{A_{\delta, \varepsilon}}{n^{\varepsilon\kappa_{\delta, \varepsilon}}}. \quad (161)$$

Therefore, applying the left inequality of relation (43) and the right inequality of relation (44) we prove the following proposition.

**Proposition 3.12** For any  $\delta \in ]0, \frac{1}{2}[$  and for any  $\varepsilon \in ]0, 1 - 2\delta[$ , there exists  $\kappa_{\delta,\varepsilon} > 0$ ,  $A_{\delta,\varepsilon} > 0$  and  $C_{\delta,\varepsilon}$  such that for any memoryless source  $S$  with binary-part to compress and discrete side-information and for any integer  $\nu_0 > C_{\delta,\varepsilon}$  – noting  $n = 2^{\nu_0}$  –, we have

$$0 \leq \frac{|\mathcal{H}_{X|Y}(2^{-n^\delta}) \cap \mathcal{V}_{X|Y}^c(2^{-n^\delta})|}{n} \leq \frac{A_{\delta,\varepsilon}}{n^{\varepsilon\kappa_{\delta,\varepsilon}}} \quad (162)$$

$$H(S) - 2^{-n^\delta} \leq \frac{|\mathcal{H}_{X|Y}(2^{-n^\delta})|}{n} \leq H(S) + \frac{A_{\delta,\varepsilon}}{n^{\varepsilon\kappa_{\delta,\varepsilon}}} \quad (163)$$

$$H(S) - \frac{A_{\delta,\varepsilon}}{n^{\varepsilon\kappa_{\delta,\varepsilon}}} \leq \frac{|\mathcal{V}_{X|Y}(2^{-n^\delta})|}{n} \leq H(S) + 2^{-n^\delta}, \quad (164)$$

where  $A_{\delta,\varepsilon}$  satisfies the inequalities (152).

### 3.4 Order of magnitude of constants

In this subsection we study the values of the constants  $c_\beta$  and  $c_\delta$  with numerical simulations. Firstly we compute the solution<sup>9</sup>  $\alpha = \alpha(\beta)$  of the equation

$$\varphi\left(\frac{\log \alpha - \log \beta}{\beta}\right) = 1 \quad \Leftrightarrow \quad \frac{\beta}{\alpha} + \frac{\beta}{\log \alpha - \log \beta} = \beta, \quad (165)$$

such that

$$c_\beta^{(1)} = \frac{1}{\beta} \log\left(\frac{\alpha(\beta)}{\beta}\right) \quad (166)$$

is the smallest permissible value of  $c_\beta$  satisfying (68). Moreover we find a simple expression

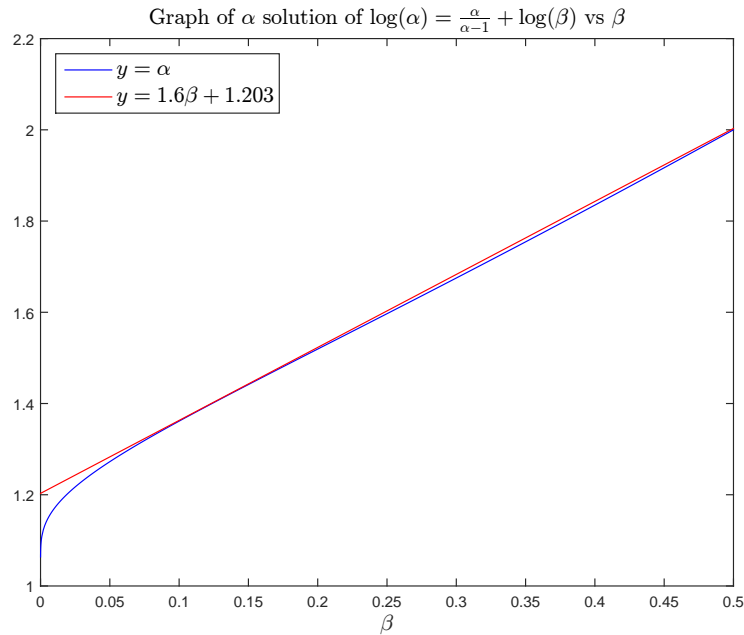

Figure 5: Graphs of  $\alpha(\beta)$  solution of equation (165) and of an affine upper bound.

$$c_\beta^{(2)} = \frac{1}{\beta} \log\left(\frac{1.6\beta + 1.203}{\beta}\right) \quad (167)$$

slightly greater than the smallest value  $c_\beta^{(1)}$  (see Figures 5–7).

<sup>9</sup>Let us remark that this new function  $\alpha$  is not connected to the  $\alpha$  function introduced in (129).

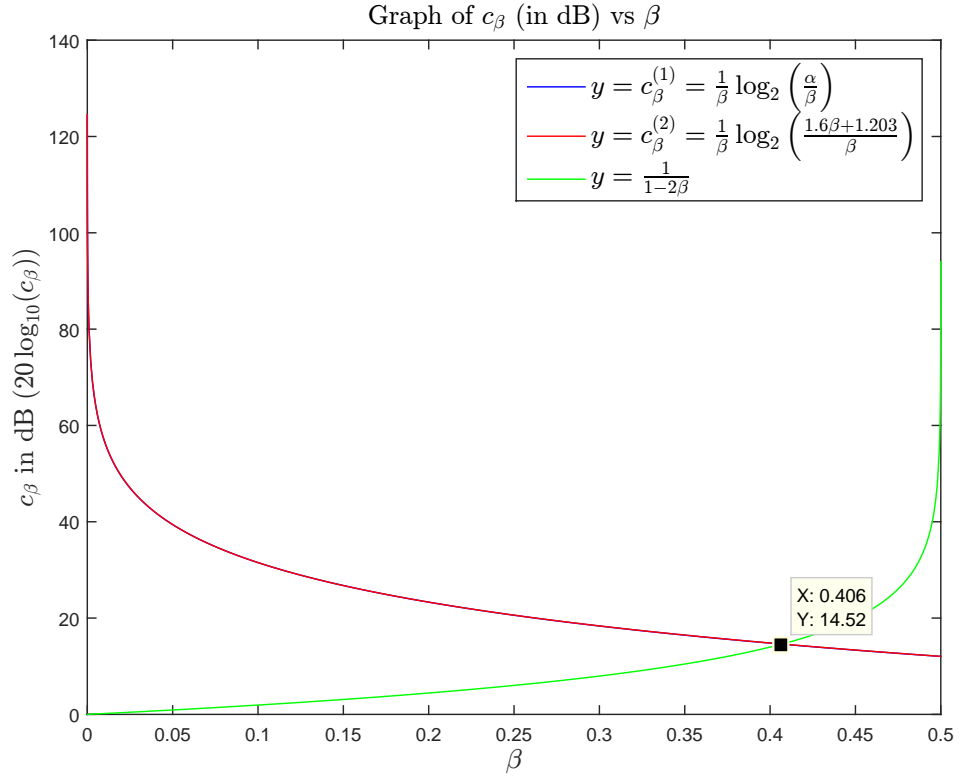

Figure 6: Graphs of  $c_\beta^{(1)}$ ,  $c_\beta^{(2)}$  and  $\frac{1}{1-2\beta}$ .

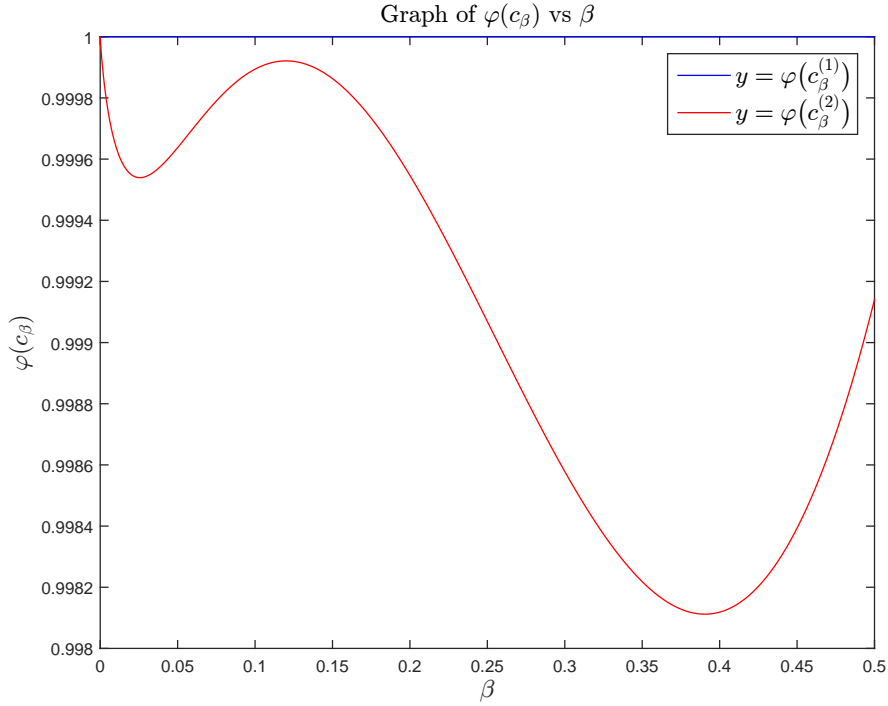

Figure 7: Graphs of  $\varphi(c_\beta^{(1)})$  and  $\varphi(c_\beta^{(2)})$ .

Secondly, we assume that inequality (134) is an equality and replacing  $\alpha$  by the expression (129), we obtain

$$\log(1/\rho) = \frac{\log(1/\Lambda)}{1+\alpha} = \frac{2\xi \ln(1/\Lambda)}{2\xi \ln 2 + (1-2\beta)^2} \quad (168)$$

and we express  $c'_\beta$  and  $c_\delta$  introduced in relations (71,72) as functions of  $\beta$  and  $\xi$ .

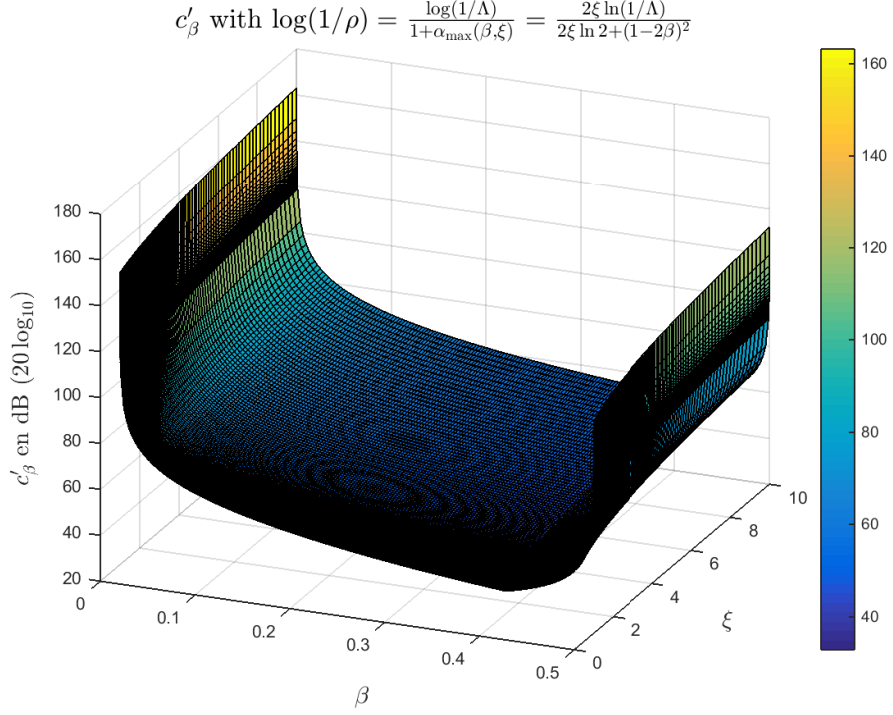

Figure 8: *Graphs of  $c'_\beta$  versus  $\xi$  and  $\beta$ .*

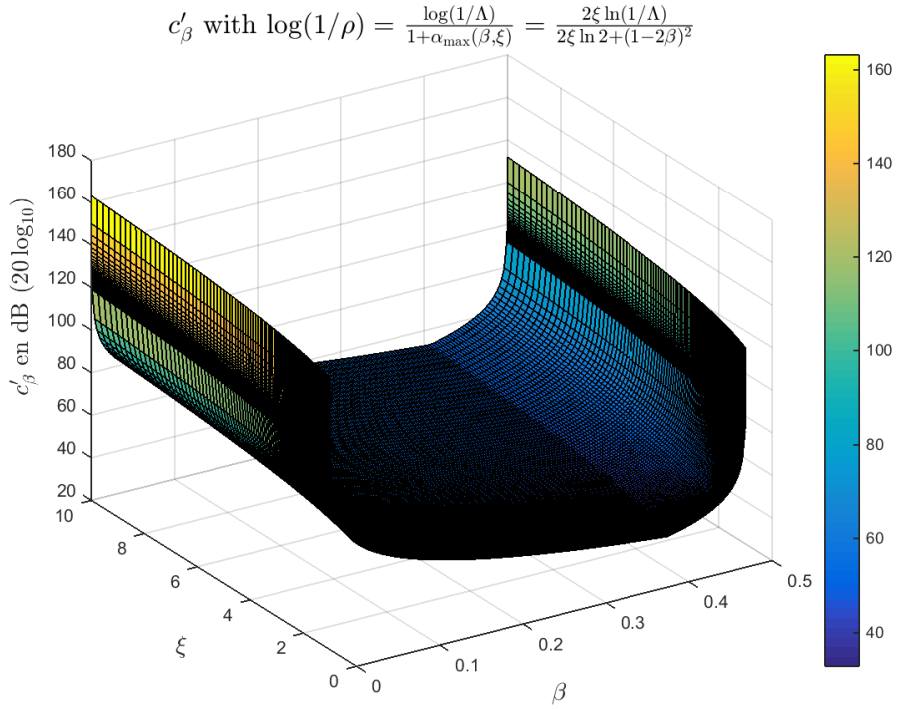

Figure 9: *Graphs of  $c'_\beta$  versus  $\xi$  and  $\beta$ .*

Let us denote

$$c_\delta^{(1)} = \frac{(1 + \alpha_0)\xi}{(\xi - 1) \log(1/\rho)} \quad (169)$$

appearing in the definition (72) of  $c_\delta$ .

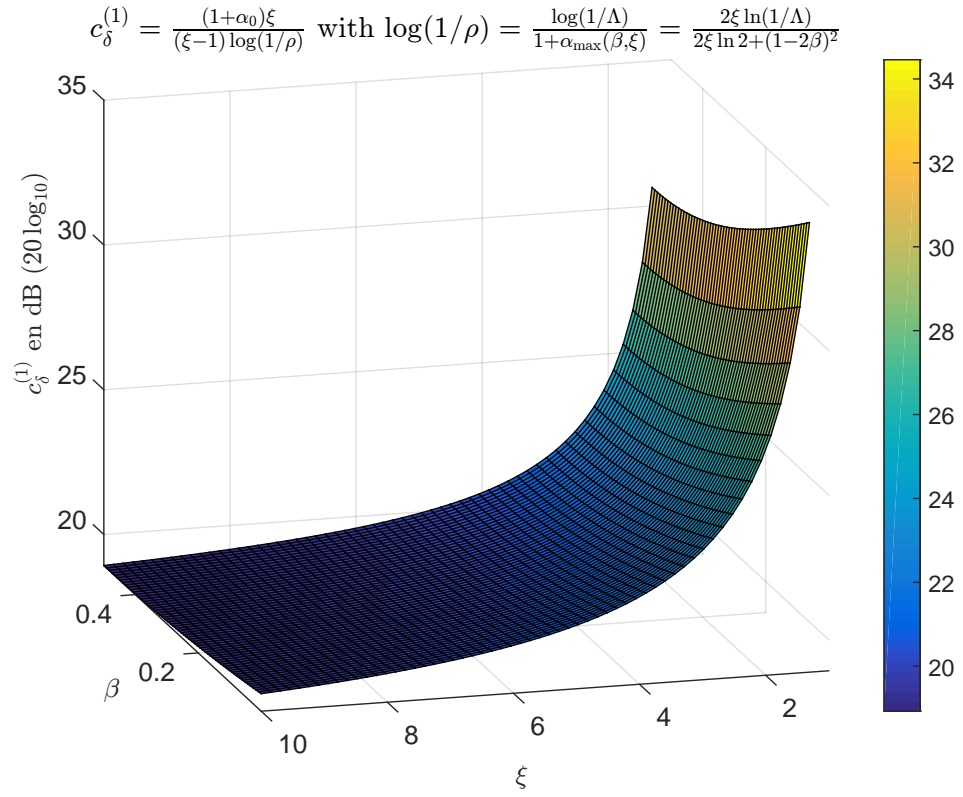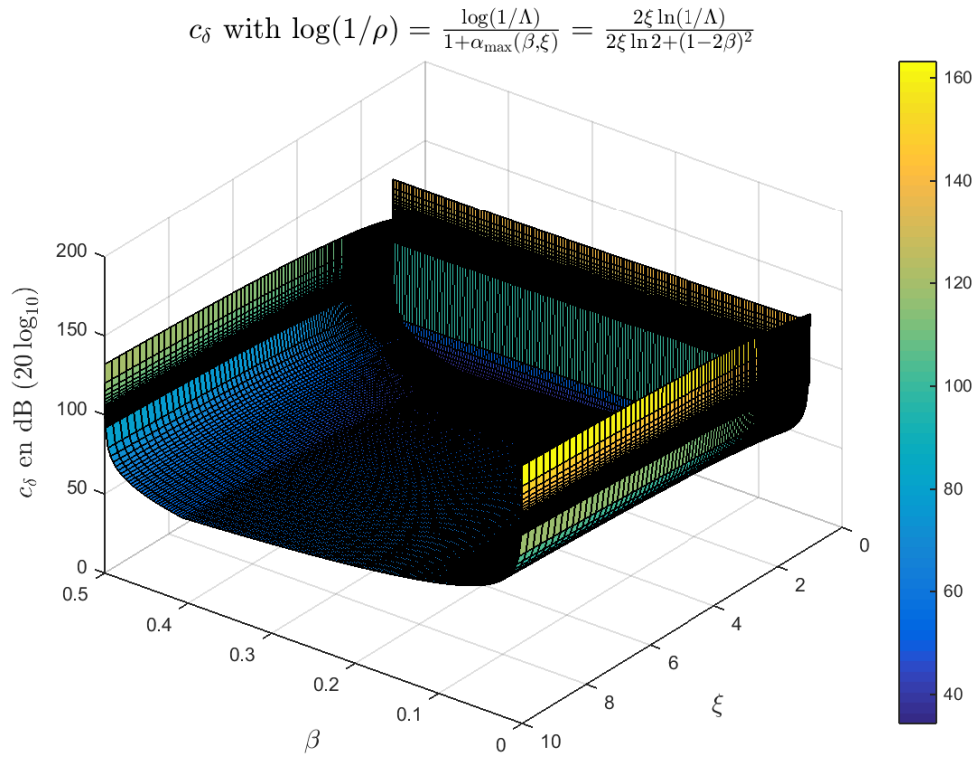

$$c_\delta \text{ with } \log(1/\rho) = \frac{\log(1/\Lambda)}{1+\alpha_{\max}(\beta, \xi)} = \frac{2\xi \ln(1/\Lambda)}{2\xi \ln 2 + (1-2\beta)^2}$$

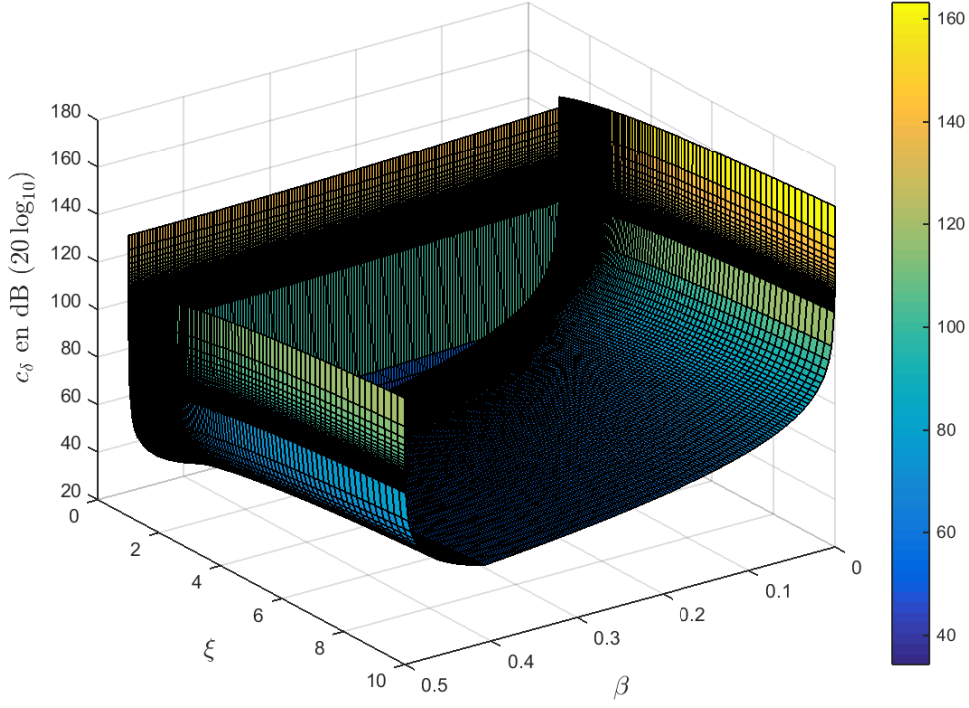

Figure 10: *Graphs of  $c_\delta$  versus  $\xi$  and  $\beta$ .*

In order to have

$$c \stackrel{\text{def}}{=} \left\lceil \frac{\gamma \xi}{\log(1/\rho)} \right\rceil = \frac{\gamma \xi}{\log(1/\rho)} \quad (170)$$

with  $\rho$  satisfying equality (168) and  $\xi > 1$  as small as possible, we set  $\xi_{\min}$  as the value of  $\xi$  solution of equations (168) and

$$\frac{(1-\varepsilon)\xi}{\varepsilon \log(1/\rho)} = \min \left( \mathbb{N}^* \cap \left\{ \frac{(1-\varepsilon)\xi}{\varepsilon \log(1/\rho)} : \xi > 1 \right\} \right). \quad (171)$$

Table 1: Some numerical values obtained by simulations.

| $\delta$ | $\varepsilon$ | $\beta$ | $\gamma$ | $c_\beta^{(2)}$ | $\frac{1}{1-2\beta}$ | $\xi_{\min}$ | $\log(\frac{1}{\rho})$ | $c'_\beta$ | $c_\delta$ | $A_{\delta,\varepsilon}$ | $C_{\delta,\varepsilon}$ | $\kappa_\varepsilon = \kappa_{\delta,\varepsilon}$ | $\varepsilon \kappa_\varepsilon$ |
|----------|---------------|---------|----------|-----------------|----------------------|--------------|------------------------|------------|------------|--------------------------|--------------------------|----------------------------------------------------|----------------------------------|
| 0.10     | 0.79          | 0.48    | 0.27     | 4.3             | 21                   | 1.42         | 0.1255                 | 316        | 316        | 30.1                     | 400                      | $1.14 \cdot 10^{-4}$                               | $9.05 \cdot 10^{-5}$             |
| 0.10     | 0.74          | 0.38    | 0.35     | 5.8             | 4.3                  | 1.03         | 0.121                  | 66         | 506        | 25.6                     | 684                      | $3.33 \cdot 10^{-3}$                               | $2.46 \cdot 10^{-3}$             |
| 0.10     | 0.69          | 0.32    | 0.45     | 7.5             | 2.8                  | 1.03         | 0.116                  | 83         | 650        | 29.5                     | 943                      | $7.04 \cdot 10^{-3}$                               | $4.86 \cdot 10^{-3}$             |
| 0.10     | 0.64          | 0.28    | 0.56     | 9.2             | 2.3                  | 1.20         | 0.112                  | 115        | 115        | 39.0                     | 179                      | $8.54 \cdot 10^{-3}$                               | $5.47 \cdot 10^{-3}$             |
| 0.10     | 0.59          | 0.24    | 0.69     | 11.1            | 2.0                  | 1.08         | 0.107                  | 127        | 270        | 41.3                     | 458                      | $1.11 \cdot 10^{-2}$                               | $6.53 \cdot 10^{-3}$             |
| 0.10     | 0.54          | 0.22    | 0.85     | 13.0            | 1.8                  | 1.10         | 0.104                  | 153        | 223        | 48.7                     | 413                      | $1.12 \cdot 10^{-2}$                               | $6.36 \cdot 10^{-3}$             |
| 0.10     | 0.49          | 0.20    | 1.04     | 15.1            | 1.6                  | 1.06         | 0.101                  | 173        | 352        | 55.3                     | 719                      | $1.24 \cdot 10^{-2}$                               | $6.05 \cdot 10^{-3}$             |
| 0.10     | 0.44          | 0.18    | 1.27     | 17.1            | 1.6                  | 1.08         | 0.099                  | 201        | 268        | 65.9                     | 610                      | $1.19 \cdot 10^{-2}$                               | $5.24 \cdot 10^{-3}$             |
| 0.10     | 0.39          | 0.16    | 1.56     | 19.3            | 1.5                  | 1.04         | 0.096                  | 221        | 557        | 75.6                     | 1428                     | $1.17 \cdot 10^{-2}$                               | $4.56 \cdot 10^{-3}$             |
| 0.10     | 0.34          | 0.15    | 1.94     | 21.5            | 1.4                  | 1.01         | 0.093                  | 243        | 2394       | 88.7                     | 7042                     | $1.10 \cdot 10^{-2}$                               | $3.74 \cdot 10^{-3}$             |
| 0.10     | 0.29          | 0.15    | 2.45     | 23.7            | 1.4                  | 1.01         | 0.092                  | 271        | 1633       | 108.9                    | 5631                     | $9.78 \cdot 10^{-3}$                               | $2.83 \cdot 10^{-3}$             |
| 0.10     | 0.24          | 0.13    | 3.17     | 26.0            | 1.4                  | 1.04         | 0.091                  | 304        | 629        | 139.1                    | 2622                     | $8.26 \cdot 10^{-3}$                               | $1.98 \cdot 10^{-3}$             |
| 0.10     | 0.19          | 0.12    | 4.26     | 28.4            | 1.3                  | 1.01         | 0.089                  | 326        | 3834       | 178.5                    | 20179                    | $6.90 \cdot 10^{-3}$                               | $1.31 \cdot 10^{-3}$             |
| 0.10     | 0.14          | 0.12    | 6.14     | 30.8            | 1.3                  | 1.01         | 0.088                  | 355        | 3168       | 251.3                    | 22634                    | $5.21 \cdot 10^{-3}$                               | $7.31 \cdot 10^{-4}$             |
| 0.10     | 0.09          | 0.11    | 10.11    | 33.2            | 1.3                  | 1.00         | 0.087                  | 384        | 8302       | 403.1                    | 92253                    | $3.44 \cdot 10^{-3}$                               | $3.10 \cdot 10^{-4}$             |
| 0.10     | 0.04          | 0.10    | 24       | 35.7            | 1.3                  | 1.00         | 0.087                  | 414        | 6290       | 937.4                    | 157257                   | $1.56 \cdot 10^{-3}$                               | $6.24 \cdot 10^{-5}$             |
